# Supplementary material for: Metabolomics reveals a link between homocysteine and lipid metabolism and leukocyte telomere length: the ENGAGE consortium
Source: PubMed Central journal article supplement (PMC6690953; doi:10.1038/s41598-019-47282-6), 2019-08-12
Supplement: 41598_2019_47282_MOESM1_ESM.pdf [file 41598_2019_47282_MOESM1_ESM.pdf]

## Supplementary Material

Metabolomics reveals a link between homocysteine and lipid metabolism and leukocyte telomere length: the ENGAGE consortium

Ashley van der Spek<sup>1†</sup>, Linda Broer<sup>1,2‡</sup>, Harmen HM Draisma<sup>3-5‡</sup>, René Pool<sup>3,4,6‡</sup>, Eva Albrecht<sup>7</sup>, Marian Beekman<sup>8</sup>, Massimo Mangino<sup>9,10</sup>, Mait Raag<sup>11</sup>, Dale R. Nyholt<sup>12</sup>, Harish K. Dharuri<sup>13</sup>, Veryan Codd<sup>14</sup>, Najaf Amin<sup>1</sup>, Eco J.C. de Geus<sup>3,4</sup>, Joris Deelen<sup>8,15</sup>, Ayse Demirkan<sup>1,13</sup>, Idil Yet<sup>9,16</sup>, Krista Fischer<sup>17,18</sup>, Toomas Haller<sup>17</sup>, Anjali K. Henders<sup>19</sup>, Aaron Isaacs<sup>20</sup>, Sarah E. Medland<sup>21</sup>, Grant W. Montgomery<sup>21</sup>, Simon P. Mooijaart<sup>22</sup>, Konstantin Strauch<sup>7,23</sup>, H. Eka D. Suchiman<sup>8</sup>, Anika A.M. Vaarhorst<sup>8</sup>, Diana van Heemst<sup>22</sup>, Rui Wang-Sattler<sup>24</sup>, John B. Whitfield<sup>21</sup>, Gonneke Willemsen<sup>3,4</sup>, Margaret J. Wright<sup>25</sup>, Nicholas G. Martin<sup>21</sup>, Nilesh J. Samani<sup>14</sup>, Andres Metspalu<sup>17</sup>, P. Eline Slagboom<sup>8</sup>, Tim D. Spector<sup>9</sup>, Dorret I. Boomsma<sup>3,4,6#</sup>, Cornelia M. van Duijn<sup>1,26,27#\*</sup>, Christian Gieger<sup>7#</sup>

- 1 Department of Epidemiology, Erasmus Medical Center, Rotterdam, The Netherlands.
- 2 Department of Internal Medicine, Erasmus Medical Center, Rotterdam, The Netherlands.
- 3 Department of Biological Psychology, VU University Amsterdam, Amsterdam, The Netherlands.
- 4 Amsterdam Public Health research institute, Amsterdam University Medical Centers, The Netherlands.
- 5 Section of Genomics of Common Disease, Imperial College London, Burlington Danes Building Room E301, Du Cane Road, London W12 0NN.
- 6 BBMRI-NL: Infrastructure for the Application of Metabolomics Technology in Epidemiology (RP4), The Netherlands.
- 7 Institute of Genetic Epidemiology, Helmholtz Zentrum München - German Research Center for Environmental Health, Neuherberg, Germany.
- 8 Molecular Epidemiology, Department of Biomedical Data Sciences, Leiden University Medical Center, Leiden, The Netherlands.
- 9 Department of Twin Research and Genetic Epidemiology, King's College London, London, UK.
- 10 NIHR Biomedical Research Centre at Guy's and St Thomas' Foundation Trust, London SE1 9RT, UK.
- 11 Institute of Family Medicine and Public Health, University of Tartu, Tartu, Estonia.
- 12 School of Biomedical Sciences, Faculty of Health, Institute of Health and Biomedical Innovation, Queensland University of Technology, Brisbane, QLD, Australia.
- 13 Department of Human Genetics, Leiden University Medical Center, Leiden, the Netherlands.
- 14 Department of Cardiovascular Sciences, University of Leicester and NIHR Leicester Biomedical Research Centre, Glenfield Hospital, Leicester.
- 15 Max Planck Institute for Biology of Ageing, Cologne, Germany.

- 16 Department of Bioinformatics, Institute of Health Sciences, Hacettepe University, 06100, Ankara, Turkey.
- 17 Estonian Genome Center, Institute of Genomics, University of Tartu, Tartu, Estonia.
- 18 Institute of Mathematics and Statistics, University of Tartu, Estonia.
- 19 The Institute for Molecular Biosciences, The University of Queensland, Brisbane, Australia.
- 20 CARIM School for Cardiovascular Diseases, Maastricht Centre for Systems Biology (MaCSBio), and Department of Biochemistry, Maastricht University, Maastricht, the Netherlands.
- 21 QIMR Berghofer Medical Research Institute, Brisbane, Australia.
- 22 Department of Gerontology and Geriatrics, Leiden University Medical Center, Leiden, The Netherlands.
- 23 Chair of Genetic Epidemiology, IBE, Faculty of Medicine, LMU Munich, Germany.
- 24 Research Unit of Molecular Epidemiology, Helmholtz Zentrum München - German Research Center for Environmental Health, Neuherberg, Germany.
- 25 Queensland Brain Institute, The University of Queensland, Brisbane, Australia.
- 26 Leiden Academic Centre for Drug Research, Leiden University, Leiden, Netherlands.
- 27 Nuffield Department of Population Health, University of Oxford, Oxford, UK.

<sup>†</sup>These authors contributed equally to this manuscript (shared first)

<sup>#</sup>These authors contributed equally to this manuscript (shared last)

\*Corresponding author:

Prof. Cornelia M. van Duijn

[c.vanduijn@erasmusmc.nl](mailto:c.vanduijn@erasmusmc.nl)

Department of Epidemiology

Erasmus Medical Center

P.O. Box 2040, 3000 CA

Rotterdam, the Netherlands

## Cohort descriptions

The **KORA** (Cooperative Health Research in the Region of Augsburg) study is a series of independent population-based epidemiological surveys and follow-up studies of participants living in the region of Augsburg, Southern Germany<sup>1</sup>. All survey participants are of German nationality, identified through the registration office. Informed consent has been given by all participants. The present study includes data of the KORA F4 (2006-2008) study which is a follow-up study of the KORA S4 survey (1999-2001).

The Netherlands Twin Register (**NTR**: <http://www.tweelingenregister.org/>) recruits twins and their family members to study the causes of individual differences in health, behavior and lifestyle. Participants are followed longitudinally; details about the cohort have been published previously<sup>2</sup>. A subsample of unselected twins and their family members has taken part in the NTR-Biobank<sup>3</sup> in which biological samples, including DNA and RNA, were collected in a standardized manner after overnight fasting. Study protocols were approved by the Central Ethics Committee on Research Involving Human Subjects of the VU University Medical Centre, Amsterdam, an Institutional Review Board certified by the U.S. Office of Human Research Protections (IRB number IRB00002991 under Federal-wide Assurance- FWA00017598; IRB/institute codes, NTR 03-180).

The Estonian Genome Center, University of Tartu (**EGCUT**) is a population-based biobank of the Estonian Genome Project of University of Tartu ([www.biobank.ee](http://www.biobank.ee))<sup>4</sup>. The current cohort size is over 51,515, from 18 years of age and up, which reflects closely the age distribution in the adult Estonian population. The samples included in this study form a random subset of the cohort, with the exception of 500 female individuals aged 83+ which were specifically selected

according to age and sex. Subjects are recruited by the general practitioners (GP) and physicians in the hospitals. Each participant filled out a Computer Assisted Personal interview, including personal data (place of birth, place(s) of living, nationality etc.), genealogical data (family history, three generations), educational and occupational history and lifestyle data (physical activity, dietary habits, smoking, alcohol consumption, women's health, quality of life). Anthropometric and physiological measurements were also taken.

The UK Adult Twin Registry (or **TwinsUK** Registry) is a cohort of volunteer adult twins from all over the United Kingdom<sup>5</sup>. The Registry was started in 1992 with the primary aim of assessment of heritability of osteoarthritis and osteoporosis in women. The success of early studies led to rapid evolution of the registry and it now incorporates about 13 000 twins, both male and female aged 18–103 years. For a total of 1235 participants, samples have been measured using the Biocrates Absolute IDQ™-kit p150 (BIOCRATES Life Sciences AG, Innsbruck, Austria) metabolomics platform<sup>5,6</sup>. In total, 810 participants with both LTL qPCR measurements as well as metabolomics data (Biocrates) were included in this analysis. Ethical approval was obtained from the Guy's and St. Thomas' Hospital Ethics Committee. Written informed consent was obtained from every participant in the study.

The Erasmus Rucphen Family (**ERF**) study is a family-based study including 3,000 living descendants of 22 couples who had at least 6 children baptized in the community church around 1850-1900. Individuals who were 18 years or older were invited to participate in the study and were not selected on any disease or other outcome. Details about the genealogy of the population have been described elsewhere<sup>7,8</sup>. The study protocol was approved by the

Medical Ethical Committee of the Erasmus University Medical Center, Rotterdam, the Netherlands. All participants provided written informed consent.

For the Leiden Longevity Study (**LLS**), long-lived siblings of Dutch descent were recruited together with their offspring and the partners of thereof. Families were included if at least two long-lived siblings were alive and fulfilled the age criterion of 89 years or older for males and 91 years or older for females, representing less than 0.5% of the Dutch population in 2001<sup>9</sup>. In total, 944 long-lived proband siblings from 421 families with a mean age of 94 years (range, 89-104), 1,671 offspring (61 years, 39-81), and 744 partners (60 years, 36-79) were included in the study. DNA from the LLS was extracted from samples at baseline using conventional methods<sup>10</sup>. For the current analysis only the offspring and their partners were used.

The Queensland Institute of Medical Research (**QIMR**) adolescent study comprised twins and their non-twin siblings living in south-east Queensland, Australia<sup>11</sup>. Most (98% by self-report) are of mixed European ancestry, mainly from the British Isles. The participants are not selected on the basis of any disease or other outcome. Blood samples were collected at the end of testing sessions from participants and, if possible, from their parents. Pedigree relationships and zygosity were confirmed by genotype data. Further details are provided elsewhere<sup>12</sup>.

### **Telomere length measurements**

All samples from all studies were measured in the same laboratory under standard conditions. Mean leukocyte telomere length was measured by quantitative PCR-based technique as previously described<sup>13,14</sup>. This method expresses telomere length as a ratio (T/S) of telomere repeat length (T) to copy number of a single copy gene, 36B4(S), within each sample. Samples

were quantified relative to a calibrator sample used on each run (DNA from the K562 cell line)<sup>14</sup>. Mean inter-run coefficients of variation (CVs) were calculated for all study cohorts and these were less than 5% in all.

### **Metabolite measurements and quality control**

Targeted metabolite profiling was performed on a targeted metabolomics platform (Biocrates AbsoluteIDQ p150 kit, BIOCRATES Life Sciences AG, Austria) using electrospray ionization tandem mass spectrometry (MS/MS). The company had no access to genotype or phenotype information that would have permitted any data pre-filtering other than objective quality control for measurement errors based on internal controls and duplicates. Details of the metabolomics measurement technique are described by patent US 2007/0004044 (accessible online at <http://www.freepatentsonline.com/20070004044.html>). A summary of the method can be found in <sup>15,16</sup> and an overview of the metabolomics field and the related technologies is provided in the review paper by Wenk<sup>17</sup>. In summary, a targeted profiling scheme is used to quantitatively screen for known small-molecule metabolites using multiple reaction monitoring, neutral loss and precursor ion scans. Quantification of the metabolites in the biological sample is achieved by reference to appropriate internal standards. The reproducibility of the Biocrates kit was determined by assaying three spiking levels of blood plasma (low, medium, high) using the available standards with six replicates.

Metabolite quality control was performed separately per study and has been described previously<sup>18</sup>. A summary is provided below. CVs were calculated for each metabolite *i* and plate

$j$ , as metabolite profile measurements were performed on multiple plates:  $CV_{i,j} = \frac{sd_{i,j}}{mean_{i,j}}$ ,

where the standard deviation (*sd*) and *mean* were calculated over all five reference measurements per plate  $j$ . For each cohort, the summary statistics were compared with measurement detection limit specifications provided by BIOCRATES Life Sciences AG.

There were three reasons to exclude a metabolite from analyses (Supplementary Table 1): the mean  $CV_i$  over all plates was higher than 25% and/or there were more than 5% missing values. Additionally, metabolites reported as absolute concentrations ( $\mu\text{M}$ ) were excluded if the median was below the lower limit of quantification (LLOQ) and semi-quantitatively determined metabolites were excluded if their median measurement values were below the limit of detection (LOD). Outlying metabolite concentration values (data points) were also excluded. Outlying data points were defined as data points that deviated more than five SDs from the mean value for each metabolite. Samples were excluded if they contained more than three outlying data points in metabolites that were less than 70% correlated with each other. Missing values in the remaining metabolite data were imputed using a multiple imputation procedure as implemented in the 'mice' package in the statistical language and environment "R"<sup>19</sup>.

## Supplementary references

- 1 Wichmann, H. E., Gieger, C., Illig, T. & Group, M. K. S. KORA-gen--resource for population genetics, controls and a broad spectrum of disease phenotypes. *Gesundheitswesen* **67 Suppl 1**, S26-30, doi:10.1055/s-2005-858226 (2005).
- 2 Boomsma, D. I. *et al.* Netherlands Twin Register: from twins to twin families. *Twin Res Hum Genet* **9**, 849-857, doi:10.1375/183242706779462426 (2006).
- 3 Willemsen, G. *et al.* The Netherlands Twin Register biobank: a resource for genetic epidemiological studies. *Twin Res Hum Genet* **13**, 231-245, doi:10.1375/twin.13.3.231 (2010).
- 4 Nelis, M. *et al.* Genetic structure of Europeans: a view from the North-East. *PLoS One* **4**, e5472, doi:10.1371/journal.pone.0005472 (2009).
- 5 Moayyeri, A., Hammond, C. J., Valdes, A. M. & Spector, T. D. Cohort Profile: TwinsUK and healthy ageing twin study. *Int. J. Epidemiol.* **42**, 76-85, doi:10.1093/ije/dyr207 (2013).
- 6 Menni, C. *et al.* Targeted metabolomics profiles are strongly correlated with nutritional patterns in women. *Metabolomics* **9**, 506-514, doi:10.1007/s11306-012-0469-6 (2013).
- 7 Aulchenko, Y. S. *et al.* Linkage disequilibrium in young genetically isolated Dutch population. *Eur. J. Hum. Genet.* **12**, 527-534, doi:10.1038/sj.ejhg.5201188 (2004).
- 8 Pardo, L. M., MacKay, I., Oostra, B., van Duijn, C. M. & Aulchenko, Y. S. The effect of genetic drift in a young genetically isolated population. *Ann. Hum. Genet.* **69**, 288-295, doi:10.1046/j.1529-8817.2005.00162.x (2005).
- 9 Schoenmaker, M. *et al.* Evidence of genetic enrichment for exceptional survival using a family approach: the Leiden Longevity Study. *Eur. J. Hum. Genet.* **14**, 79-84, doi:10.1038/sj.ejhg.5201508 (2006).
- 10 Beekman, M. *et al.* Chromosome 4q25, microsomal transfer protein gene, and human longevity: novel data and a meta-analysis of association studies. *J. Gerontol. A Biol. Sci. Med. Sci.* **61**, 355-362 (2006).
- 11 Wright, M. J. & Martin, N. G. Brisbane adolescent twin study: outline of study methods and research projects. *Aust J Psychol* **56**, 65-78 (2004).
- 12 Medland, S. E. *et al.* Common variants in the trichohyalin gene are associated with straight hair in Europeans. *Am. J. Hum. Genet.* **85**, 750-755, doi:10.1016/j.ajhg.2009.10.009 (2009).
- 13 Cawthon, R. M. Telomere measurement by quantitative PCR. *Nucleic Acids Res.* **30**, e47 (2002).
- 14 Codd, V. *et al.* Common variants near TERC are associated with mean telomere length. *Nat. Genet.* **42**, 197-199, doi:10.1038/ng.532 (2010).
- 15 Unterwurzacher, I., Koal, T., Bonn, G. K., Weinberger, K. M. & Ramsay, S. L. Rapid sample preparation and simultaneous quantitation of prostaglandins and lipoxygenase derived fatty acid metabolites by liquid chromatography-mass spectrometry from small sample volumes. *Clin. Chem. Lab. Med.* **46**, 1589-1597, doi:10.1515/CCLM.2008.323 (2008).
- 16 Weinberger, K. M. [Metabolomics in diagnosing metabolic diseases] Einsatz von Metabolomics zur Diagnose von Stoffwechselkrankheiten. *Ther. Umsch.* **65**, 487-491, doi:10.1024/0040-5930.65.9.487 (2008).
- 17 Wenk, M. R. The emerging field of lipidomics. *Nat Rev Drug Discov* **4**, 594-610, doi:10.1038/nrd1776 (2005).
- 18 Draisma, H. H. M. *et al.* Genome-wide association study identifies novel genetic variants contributing to variation in blood metabolite levels. *Nat Commun* **6**, 7208, doi:10.1038/ncomms8208 (2015).
- 19 R: A language and environment for statistical computing v. 2.12.1 (R foundation for Statistical Computing, Vienna, Austria, 2010).



## Supplementary Tables

Supplementary Table 1: Exclusion reasons for each metabolite per cohort

| Mtb             | KORA |    |    | NTR |    |    | EGCUT |    |    | TwinsUK |    |    | ERF |    |    | LLS |    |    | QIMR |    |    |
|-----------------|------|----|----|-----|----|----|-------|----|----|---------|----|----|-----|----|----|-----|----|----|------|----|----|
|                 | C1   | C2 | C3 | C1  | C2 | C3 | C1    | C2 | C3 | C1      | C2 | C3 | C1  | C2 | C3 | C1  | C2 | C3 | C1   | C2 | C3 |
| C0              | +    | +  | +  | +   | +  | +  | +     | +  | +  | +       | +  | +  | +   | +  | +  | +   | +  | +  | +    | +  | +  |
| C10             | +    | +  | +  | +   | +  | -  | -     | +  | -  | +       | +  | -  | +   | +  | +  | +   | +  | -  | +    | +  | -  |
| C10:1           | +    | +  | +  | +   | +  | +  | -     | +  | -  | +       | +  | +  | +   | +  | +  | +   | +  | +  | +    | +  | -  |
| C10:2           | +    | +  | +  | +   | +  | +  | -     | +  | -  | +       | +  | +  | +   | +  | +  | +   | +  | +  | +    | +  | -  |
| C12             | +    | +  | -  | +   | +  | -  | -     | +  | -  | +       | +  | -  | +   | +  | -  | +   | +  | -  | +    | +  | -  |
| C12-DC          | +    | +  | -  | +   | +  | -  | -     | +  | -  | +       | +  | -  | +   | +  | -  | +   | +  | -  | +    | +  | -  |
| C12:1           | +    | +  | +  | +   | +  | +  | +     | +  | +  | +       | +  | +  | +   | +  | +  | +   | +  | +  | +    | +  | +  |
| C14             | +    | +  | -  | +   | +  | -  | -     | +  | -  | +       | +  | -  | +   | +  | -  | +   | +  | -  | +    | +  | -  |
| C14:1           | +    | +  | +  | +   | +  | +  | +     | +  | +  | +       | +  | +  | +   | +  | +  | +   | +  | +  | +    | +  | +  |
| C14:1-OH        | +    | +  | -  | +   | +  | -  | -     | +  | -  | +       | +  | +  | +   | +  | -  | +   | +  | +  | +    | +  | -  |
| C14:2           | +    | +  | +  | +   | +  | +  | -     | +  | -  | +       | +  | +  | +   | +  | +  | +   | +  | +  | +    | +  | -  |
| C14:2-OH        | +    | +  | -  | +   | +  | -  | -     | +  | -  | +       | +  | -  | +   | +  | -  | +   | +  | -  | +    | +  | -  |
| C16             | +    | +  | -  | +   | +  | -  | +     | +  | -  | +       | +  | -  | +   | +  | -  | +   | +  | -  | +    | +  | -  |
| C16-OH          | -    | +  | -  | -   | +  | -  | -     | +  | -  | -       | +  | -  | +   | +  | -  | +   | +  | -  | +    | +  | -  |
| C16:1           | +    | +  | -  | +   | +  | -  | -     | +  | -  | +       | +  | -  | +   | +  | -  | +   | +  | -  | +    | +  | -  |
| C16:1-OH        | +    | +  | -  | -   | +  | -  | -     | +  | -  | +       | +  | -  | +   | +  | -  | +   | +  | -  | +    | +  | -  |
| C16:2           | -    | +  | -  | -   | +  | -  | -     | +  | -  | -       | +  | +  | +   | +  | +  | +   | -  | +  | +    | -  |    |
| C16:2-OH        | +    | +  | -  | -   | +  | -  | -     | +  | -  | +       | +  | -  | -   | +  | -  | +   | +  | -  | +    | +  | -  |
| C18             | +    | +  | -  | +   | +  | -  | -     | +  | -  | +       | +  | -  | +   | +  | -  | +   | +  | -  | +    | +  | -  |
| C18:1           | +    | +  | +  | +   | +  | +  | +     | +  | -  | +       | +  | +  | +   | +  | +  | +   | +  | +  | +    | +  | +  |
| C18:1-OH        | -    | +  | -  | -   | +  | -  | -     | +  | -  | -       | +  | -  | +   | +  | -  | +   | +  | -  | +    | +  | -  |
| C18:2           | +    | +  | +  | +   | +  | +  | +     | +  | +  | +       | +  | +  | +   | +  | +  | +   | +  | +  | +    | +  | +  |
| C2              | +    | +  | +  | +   | +  | +  | +     | +  | +  | +       | +  | +  | +   | +  | +  | +   | +  | +  | +    | +  | +  |
| C3              | +    | +  | -  | +   | +  | -  | +     | +  | -  | +       | +  | -  | +   | +  | +  | +   | +  | +  | +    | +  | -  |
| C3-DC (C4-OH)   | +    | +  | -  | +   | +  | -  | -     | +  | -  | +       | +  | -  | +   | +  | -  | +   | +  | -  | +    | +  | -  |
| C3-OH           | -    | +  | -  | -   | +  | -  | -     | +  | -  | -       | +  | -  | +   | +  | +  | +   | +  | +  | +    | +  | -  |
| C3:1            | -    | +  | -  | -   | +  | -  | -     | +  | -  | -       | +  | -  | +   | +  | -  | +   | +  | -  | +    | +  | -  |
| C4              | +    | +  | -  | +   | +  | -  | +     | +  | -  | +       | +  | -  | +   | +  | -  | +   | +  | -  | +    | +  | -  |
| C4:1            | -    | +  | -  | +   | +  | -  | -     | +  | -  | -       | +  | -  | +   | +  | -  | +   | +  | -  | +    | +  | -  |
| C5              | +    | +  | -  | +   | +  | -  | +     | +  | -  | +       | +  | -  | +   | +  | -  | +   | +  | -  | +    | +  | -  |
| C5-DC (C6-OH)   | +    | +  | -  | +   | +  | -  | -     | +  | -  | +       | +  | -  | +   | +  | -  | +   | +  | -  | +    | +  | -  |
| C5-M-DC         | +    | +  | -  | +   | +  | -  | -     | +  | -  | +       | +  | -  | +   | +  | -  | +   | +  | -  | +    | +  | -  |
| C5-OH (C3-DC-M) | +    | +  | -  | +   | +  | -  | -     | +  | -  | +       | +  | -  | +   | +  | -  | +   | +  | -  | +    | +  | -  |
| C5:1            | +    | +  | -  | +   | +  | -  | -     | +  | -  | +       | +  | -  | +   | +  | -  | +   | +  | -  | +    | +  | -  |
| C5:1-DC         | +    | +  | -  | +   | +  | +  | -     | +  | -  | +       | +  | -  | +   | +  | +  | +   | +  | -  | +    | +  | -  |

| Mtb          | KORA |    |    | NTR |    |    | EGCUT |    |    | TwinsUK |    |    | ERF |    |    | LLS |    |    | QIMR |    |    |
|--------------|------|----|----|-----|----|----|-------|----|----|---------|----|----|-----|----|----|-----|----|----|------|----|----|
|              | C1   | C2 | C3 | C1  | C2 | C3 | C1    | C2 | C3 | C1      | C2 | C3 | C1  | C2 | C3 | C1  | C2 | C3 | C1   | C2 | C3 |
| C6 (C4:1-DC) | +    | +  | -  | +   | +  | -  | -     | +  | -  | +       | +  | -  | +   | +  | -  | +   | +  | -  | +    | +  | -  |
| C6:1         | +    | +  | -  | +   | +  | -  | -     | +  | -  | +       | +  | -  | +   | +  | -  | +   | +  | -  | +    | +  | -  |
| C7-DC        | +    | +  | +  | +   | +  | +  | -     | +  | -  | +       | +  | +  | +   | +  | +  | +   | +  | +  | +    | +  | -  |
| C8           | +    | +  | +  | +   | +  | -  | -     | +  | -  | +       | +  | -  | +   | +  | +  | +   | +  | -  | +    | +  | -  |
| C8:1         | +    | +  | +  | +   | +  | +  | +     | +  | +  | +       | +  | +  | +   | +  | +  | +   | +  | +  | +    | +  | +  |
| C9           | +    | +  | +  | +   | +  | -  | -     | +  | -  | +       | +  | +  | +   | +  | +  | +   | +  | +  | +    | +  | -  |
| Arg          | +    | +  | +  | +   | +  | +  | +     | +  | -  | +       | +  | +  | +   | +  | +  | +   | +  | +  | +    | +  | -  |
| Gln          | +    | +  | +  | +   | +  | +  | +     | +  | +  | +       | +  | +  | +   | +  | +  | +   | +  | +  | +    | +  | +  |
| Gly          | +    | +  | +  | +   | +  | +  | +     | +  | +  | +       | +  | +  | +   | +  | +  | +   | +  | +  | +    | +  | +  |
| His          | +    | +  | +  | +   | +  | +  | +     | +  | +  | +       | +  | +  | +   | +  | +  | +   | +  | +  | +    | +  | +  |
| Met          | +    | +  | +  | +   | +  | +  | +     | +  | +  | +       | +  | +  | +   | +  | +  | +   | +  | +  | +    | +  | +  |
| Orn          | +    | +  | +  | +   | +  | +  | +     | +  | +  | +       | +  | +  | +   | +  | +  | +   | +  | +  | +    | +  | +  |
| Phe          | +    | +  | +  | +   | +  | +  | +     | +  | +  | +       | +  | +  | +   | +  | +  | +   | +  | +  | +    | +  | +  |
| Pro          | +    | +  | +  | +   | +  | +  | +     | +  | +  | +       | +  | +  | +   | +  | +  | +   | +  | +  | +    | +  | +  |
| Ser          | +    | +  | +  | +   | +  | +  | +     | +  | +  | +       | +  | +  | +   | +  | +  | +   | +  | +  | +    | +  | +  |
| Thr          | +    | +  | +  | +   | +  | +  | +     | +  | -  | +       | +  | +  | -   | +  | +  | +   | +  | +  | +    | +  | +  |
| Trp          | +    | +  | +  | +   | +  | +  | +     | +  | -  | +       | +  | +  | -   | +  | +  | +   | +  | +  | +    | +  | +  |
| Tyr          | +    | +  | +  | +   | +  | +  | +     | +  | +  | +       | +  | +  | -   | +  | +  | +   | +  | +  | +    | +  | +  |
| Val          | +    | +  | +  | +   | +  | +  | +     | +  | +  | +       | +  | +  | -   | +  | +  | +   | +  | +  | +    | +  | +  |
| xLeu         | +    | +  | +  | +   | +  | +  | +     | +  | +  | +       | +  | +  | -   | +  | +  | +   | +  | +  | +    | +  | +  |
| PC aa C24:0  | +    | +  | +  | -   | +  | +  | -     | +  | -  | +       | +  | +  | +   | +  | -  | +   | +  | -  | +    | +  | +  |
| PC aa C26:0  | +    | +  | -  | +   | +  | -  | -     | +  | -  | +       | +  | -  | +   | +  | -  | +   | +  | -  | +    | +  | -  |
| PC aa C28:1  | +    | +  | +  | +   | +  | +  | +     | +  | +  | +       | +  | +  | +   | +  | +  | +   | +  | +  | +    | +  | +  |
| PC aa C30:0  | +    | +  | +  | +   | +  | +  | +     | +  | +  | +       | +  | +  | +   | +  | +  | +   | +  | +  | +    | +  | +  |
| PC aa C30:2  | -    | +  | -  | -   | -  | -  | -     | -  | +  | -       | +  | +  | -   | -  | -  | -   | +  | -  | +    | -  | +  |
| PC aa C32:0  | +    | +  | +  | +   | +  | +  | +     | +  | +  | +       | +  | +  | +   | +  | +  | +   | +  | +  | +    | +  | +  |
| PC aa C32:1  | +    | +  | +  | +   | +  | +  | +     | +  | +  | +       | +  | +  | +   | +  | +  | +   | +  | +  | +    | +  | +  |
| PC aa C32:2  | +    | +  | +  | +   | +  | +  | +     | +  | +  | +       | +  | +  | +   | +  | +  | +   | +  | +  | +    | +  | +  |
| PC aa C32:3  | +    | +  | +  | +   | +  | +  | +     | +  | +  | +       | +  | +  | +   | +  | +  | +   | +  | +  | +    | +  | +  |
| PC aa C34:1  | +    | +  | +  | +   | +  | +  | +     | +  | +  | +       | +  | +  | +   | +  | +  | +   | +  | +  | +    | +  | +  |
| PC aa C34:2  | +    | +  | +  | +   | +  | +  | +     | +  | +  | +       | +  | +  | +   | +  | +  | +   | +  | +  | +    | +  | +  |
| PC aa C34:3  | +    | +  | +  | +   | +  | +  | +     | +  | +  | +       | +  | +  | +   | +  | +  | +   | +  | +  | +    | +  | +  |
| PC aa C34:4  | +    | +  | +  | +   | +  | +  | +     | +  | +  | +       | +  | +  | +   | +  | +  | +   | +  | +  | +    | +  | +  |
| PC aa C36:0  | +    | +  | +  | +   | +  | +  | +     | +  | +  | +       | +  | +  | +   | +  | +  | +   | +  | +  | +    | +  | +  |
| PC aa C36:1  | +    | +  | +  | +   | +  | +  | +     | +  | +  | +       | +  | +  | +   | +  | +  | +   | +  | +  | +    | +  | +  |
| PC aa C36:2  | +    | +  | +  | +   | +  | +  | +     | +  | +  | +       | +  | +  | +   | +  | +  | +   | +  | +  | +    | +  | +  |
| PC aa C36:3  | +    | +  | +  | +   | +  | +  | +     | +  | +  | +       | +  | +  | +   | +  | +  | +   | +  | +  | +    | +  | +  |
| PC aa C36:4  | +    | +  | +  | +   | +  | +  | +     | +  | +  | +       | +  | +  | +   | +  | +  | +   | +  | +  | +    | +  | +  |
| PC aa C36:5  | +    | +  | +  | +   | +  | +  | +     | +  | +  | +       | +  | +  | +   | +  | +  | +   | +  | +  | +    | +  | +  |
| PC aa C36:6  | +    | +  | +  | +   | +  | +  | +     | +  | +  | +       | +  | +  | +   | +  | +  | +   | +  | +  | +    | +  | +  |

| Mtb         | KORA |    |    | NTR |    |    | EGCUT |    |    | TwinsUK |    |    | ERF |    |    | LLS |    |    | QIMR |    |    |
|-------------|------|----|----|-----|----|----|-------|----|----|---------|----|----|-----|----|----|-----|----|----|------|----|----|
|             | C1   | C2 | C3 | C1  | C2 | C3 | C1    | C2 | C3 | C1      | C2 | C3 | C1  | C2 | C3 | C1  | C2 | C3 | C1   | C2 | C3 |
| PC aa C38:0 | +    | +  | +  | +   | +  | +  | +     | +  | +  | +       | +  | +  | +   | +  | +  | +   | +  | +  | +    | +  | +  |
| PC aa C38:1 | -    | +  | -  | -   | +  | +  | -     | +  | +  | -       | +  | +  | -   | +  | +  | +   | +  | +  | +    | +  | +  |
| PC aa C38:3 | +    | +  | +  | +   | +  | +  | +     | +  | +  | +       | +  | +  | +   | +  | +  | +   | +  | +  | +    | +  | +  |
| PC aa C38:4 | +    | +  | +  | +   | +  | +  | +     | +  | +  | +       | +  | +  | +   | +  | +  | +   | +  | +  | +    | +  | +  |
| PC aa C38:5 | +    | +  | +  | +   | +  | +  | +     | +  | +  | +       | +  | +  | +   | +  | +  | +   | +  | +  | +    | +  | +  |
| PC aa C38:6 | +    | +  | +  | +   | +  | +  | +     | +  | +  | +       | +  | +  | +   | +  | +  | +   | +  | +  | +    | +  | +  |
| PC aa C40:1 | +    | +  | +  | +   | +  | +  | +     | +  | -  | +       | +  | +  | +   | +  | -  | +   | +  | +  | +    | +  | -  |
| PC aa C40:2 | +    | +  | +  | +   | +  | +  | +     | +  | +  | +       | +  | +  | +   | +  | +  | +   | +  | +  | +    | +  | +  |
| PC aa C40:3 | +    | +  | +  | +   | +  | +  | +     | +  | +  | +       | +  | +  | +   | +  | +  | +   | +  | +  | +    | +  | +  |
| PC aa C40:4 | +    | +  | +  | +   | +  | +  | +     | +  | +  | +       | +  | +  | +   | +  | +  | +   | +  | +  | +    | +  | +  |
| PC aa C40:5 | +    | +  | +  | +   | +  | +  | +     | +  | +  | +       | +  | +  | +   | +  | +  | +   | +  | +  | +    | +  | +  |
| PC aa C40:6 | +    | +  | +  | +   | +  | +  | +     | +  | +  | +       | +  | +  | +   | +  | +  | +   | +  | +  | +    | +  | +  |
| PC aa C42:0 | +    | +  | +  | +   | +  | +  | +     | +  | +  | +       | +  | +  | +   | +  | +  | +   | +  | +  | +    | +  | +  |
| PC aa C42:1 | +    | +  | +  | +   | +  | +  | +     | +  | +  | +       | +  | +  | +   | +  | +  | +   | +  | +  | +    | +  | +  |
| PC aa C42:2 | +    | +  | +  | +   | +  | +  | +     | +  | +  | +       | +  | +  | +   | +  | +  | +   | +  | +  | +    | +  | +  |
| PC aa C42:4 | +    | +  | +  | +   | +  | +  | +     | +  | +  | +       | +  | +  | +   | +  | +  | +   | +  | +  | +    | +  | +  |
| PC aa C42:5 | +    | +  | +  | +   | +  | +  | +     | +  | +  | +       | +  | +  | +   | +  | +  | +   | +  | +  | +    | +  | +  |
| PC aa C42:6 | +    | +  | +  | +   | +  | +  | +     | +  | -  | +       | +  | +  | +   | +  | +  | +   | +  | +  | +    | +  | +  |
| PC ae C30:0 | +    | +  | +  | +   | +  | +  | +     | +  | -  | +       | +  | +  | +   | +  | +  | +   | +  | +  | +    | +  | +  |
| PC ae C30:1 | -    | +  | -  | -   | +  | +  | -     | -  | +  | -       | +  | +  | -   | -  | +  | -   | +  | -  | +    | -  | +  |
| PC ae C30:2 | +    | +  | -  | +   | +  | -  | -     | +  | -  | +       | +  | -  | +   | +  | -  | +   | +  | -  | +    | +  | -  |
| PC ae C32:1 | +    | +  | +  | +   | +  | +  | +     | +  | +  | +       | +  | +  | +   | +  | +  | +   | +  | +  | +    | +  | +  |
| PC ae C32:2 | +    | +  | +  | +   | +  | +  | +     | +  | +  | +       | +  | +  | +   | +  | +  | +   | +  | +  | +    | +  | +  |
| PC ae C34:0 | +    | +  | +  | +   | +  | +  | +     | +  | +  | +       | +  | +  | +   | +  | +  | +   | +  | +  | +    | +  | +  |
| PC ae C34:1 | +    | +  | +  | +   | +  | +  | +     | +  | +  | +       | +  | +  | +   | +  | +  | +   | +  | +  | +    | +  | +  |
| PC ae C34:2 | +    | +  | +  | +   | +  | +  | +     | +  | +  | +       | +  | +  | +   | +  | +  | +   | +  | +  | +    | +  | +  |
| PC ae C34:3 | +    | +  | +  | +   | +  | +  | +     | +  | +  | +       | +  | +  | +   | +  | +  | +   | +  | +  | +    | +  | +  |
| PC ae C36:0 | +    | +  | +  | +   | +  | +  | +     | +  | +  | +       | +  | +  | +   | +  | +  | +   | +  | +  | +    | +  | +  |
| PC ae C36:1 | +    | +  | +  | +   | +  | +  | +     | +  | +  | +       | +  | +  | +   | +  | +  | +   | +  | +  | +    | +  | +  |
| PC ae C36:2 | +    | +  | +  | +   | +  | +  | +     | +  | +  | +       | +  | +  | +   | +  | +  | +   | +  | +  | +    | +  | +  |
| PC ae C36:3 | +    | +  | +  | +   | +  | +  | +     | +  | +  | +       | +  | +  | +   | +  | +  | +   | +  | +  | +    | +  | +  |
| PC ae C36:4 | +    | +  | +  | +   | +  | +  | +     | +  | +  | +       | +  | +  | +   | +  | +  | +   | +  | +  | +    | +  | +  |
| PC ae C36:5 | +    | +  | +  | +   | +  | +  | +     | +  | +  | +       | +  | +  | +   | +  | +  | +   | +  | +  | +    | +  | +  |
| PC ae C38:0 | +    | +  | +  | +   | +  | +  | +     | +  | +  | +       | +  | +  | +   | +  | +  | +   | +  | +  | +    | +  | +  |
| PC ae C38:1 | +    | +  | +  | +   | +  | +  | +     | +  | +  | +       | +  | +  | +   | +  | +  | +   | +  | +  | +    | +  | +  |
| PC ae C38:2 | +    | +  | +  | +   | +  | +  | +     | +  | +  | +       | +  | +  | +   | +  | +  | +   | +  | +  | +    | +  | +  |
| PC ae C38:3 | +    | +  | +  | +   | +  | +  | +     | +  | +  | +       | +  | +  | +   | +  | +  | +   | +  | +  | +    | +  | +  |
| PC ae C38:4 | +    | +  | +  | +   | +  | +  | +     | +  | +  | +       | +  | +  | +   | +  | +  | +   | +  | +  | +    | +  | +  |
| PC ae C38:5 | +    | +  | +  | +   | +  | +  | +     | +  | +  | +       | +  | +  | +   | +  | +  | +   | +  | +  | +    | +  | +  |
| PC ae C38:6 | +    | +  | +  | +   | +  | +  | +     | +  | +  | +       | +  | +  | +   | +  | +  | +   | +  | +  | +    | +  | +  |

| Mtb            | KORA |    |    | NTR |    |    | EGCUT |    |    | TwinsUK |    |    | ERF |    |    | LLS |    |    | QIMR |    |    |
|----------------|------|----|----|-----|----|----|-------|----|----|---------|----|----|-----|----|----|-----|----|----|------|----|----|
|                | C1   | C2 | C3 | C1  | C2 | C3 | C1    | C2 | C3 | C1      | C2 | C3 | C1  | C2 | C3 | C1  | C2 | C3 | C1   | C2 | C3 |
| PC ae C40:0    | +    | +  | -  | +   | +  | -  | -     | +  | -  | +       | +  | -  | +   | +  | -  | +   | +  | -  | +    | +  | -  |
| PC ae C40:1    | +    | +  | +  | +   | +  | +  | +     | +  | +  | +       | +  | +  | +   | +  | +  | +   | +  | +  | +    | +  | +  |
| PC ae C40:2    | +    | +  | +  | +   | +  | +  | +     | +  | +  | +       | +  | +  | +   | +  | +  | +   | +  | +  | +    | +  | +  |
| PC ae C40:3    | +    | +  | +  | +   | +  | +  | +     | +  | +  | +       | +  | +  | +   | +  | +  | +   | +  | +  | +    | +  | +  |
| PC ae C40:4    | +    | +  | +  | +   | +  | +  | +     | +  | +  | +       | +  | +  | +   | +  | +  | +   | +  | +  | +    | +  | +  |
| PC ae C40:5    | +    | +  | +  | +   | +  | +  | +     | +  | +  | +       | +  | +  | +   | +  | +  | +   | +  | +  | +    | +  | +  |
| PC ae C40:6    | +    | +  | +  | +   | +  | +  | +     | +  | +  | +       | +  | +  | +   | +  | +  | +   | +  | +  | +    | +  | +  |
| PC ae C42:0    | +    | +  | +  | +   | +  | +  | +     | +  | -  | +       | +  | +  | +   | +  | +  | +   | +  | +  | +    | +  | +  |
| PC ae C42:1    | +    | +  | +  | +   | +  | +  | +     | +  | +  | +       | +  | +  | +   | +  | +  | +   | +  | +  | +    | +  | +  |
| PC ae C42:2    | +    | +  | +  | +   | +  | +  | +     | +  | +  | +       | +  | +  | +   | +  | +  | +   | +  | +  | +    | +  | +  |
| PC ae C42:3    | +    | +  | +  | +   | +  | +  | +     | +  | +  | +       | +  | +  | +   | +  | +  | +   | +  | +  | +    | +  | +  |
| PC ae C42:4    | +    | +  | +  | +   | +  | +  | +     | +  | +  | +       | +  | +  | +   | +  | +  | +   | +  | +  | +    | +  | +  |
| PC ae C42:5    | +    | +  | +  | +   | +  | +  | +     | +  | -  | +       | +  | +  | +   | +  | +  | +   | +  | +  | +    | +  | +  |
| PC ae C44:3    | +    | +  | +  | +   | +  | +  | +     | +  | +  | +       | +  | +  | +   | +  | +  | +   | +  | +  | +    | +  | +  |
| PC ae C44:4    | +    | +  | +  | +   | +  | +  | +     | +  | +  | +       | +  | +  | +   | +  | +  | +   | +  | +  | +    | +  | +  |
| PC ae C44:5    | +    | +  | +  | +   | +  | +  | +     | +  | +  | +       | +  | +  | +   | +  | +  | +   | +  | +  | +    | +  | +  |
| PC ae C44:6    | +    | +  | +  | +   | +  | +  | +     | +  | +  | +       | +  | +  | +   | +  | +  | +   | +  | +  | +    | +  | +  |
| lysoPC a C14:0 | +    | +  | -  | +   | +  | -  | -     | +  | -  | +       | +  | -  | +   | +  | -  | +   | +  | -  | +    | +  | -  |
| lysoPC a C16:0 | +    | +  | +  | +   | +  | +  | +     | +  | +  | +       | +  | +  | +   | +  | +  | +   | +  | +  | +    | +  | +  |
| lysoPC a C16:1 | +    | +  | +  | +   | +  | +  | +     | +  | +  | +       | +  | +  | +   | +  | +  | +   | +  | +  | +    | +  | +  |
| lysoPC a C17:0 | +    | +  | +  | +   | +  | +  | +     | +  | +  | +       | +  | +  | +   | +  | +  | +   | +  | +  | +    | +  | +  |
| lysoPC a C18:0 | +    | +  | +  | +   | +  | +  | +     | +  | +  | +       | +  | +  | +   | +  | +  | +   | +  | +  | +    | +  | +  |
| lysoPC a C18:1 | +    | +  | +  | +   | +  | +  | +     | +  | +  | +       | +  | +  | +   | +  | +  | +   | +  | +  | +    | +  | +  |
| lysoPC a C18:2 | +    | +  | +  | +   | +  | +  | +     | +  | +  | +       | +  | +  | +   | +  | +  | +   | +  | +  | +    | +  | +  |
| lysoPC a C20:3 | +    | +  | +  | +   | +  | +  | +     | +  | +  | +       | +  | +  | +   | +  | +  | +   | +  | +  | +    | +  | +  |
| lysoPC a C20:4 | +    | +  | +  | +   | +  | +  | +     | +  | +  | +       | +  | +  | +   | +  | +  | +   | +  | +  | +    | +  | +  |
| lysoPC a C24:0 | +    | +  | -  | +   | +  | -  | -     | +  | -  | +       | +  | -  | +   | +  | -  | +   | +  | -  | +    | +  | -  |
| lysoPC a C26:0 | -    | +  | -  | +   | +  | +  | -     | +  | -  | -       | +  | -  | +   | +  | -  | +   | +  | -  | +    | +  | -  |
| lysoPC a C26:1 | +    | +  | -  | +   | +  | -  | -     | +  | -  | +       | +  | -  | +   | +  | -  | +   | +  | -  | +    | +  | -  |
| lysoPC a C28:0 | +    | +  | +  | +   | +  | +  | +     | +  | -  | +       | +  | +  | +   | +  | +  | +   | +  | +  | +    | +  | +  |
| lysoPC a C28:1 | +    | +  | +  | +   | +  | +  | +     | +  | +  | +       | +  | +  | +   | +  | +  | +   | +  | +  | +    | +  | +  |
| lysoPC a C6:0  | -    | +  | -  | -   | +  | -  | -     | -  | -  | -       | +  | -  | -   | -  | -  | +   | -  | +  | -    | -  | -  |
| SM (OH) C14:1  | +    | +  | +  | +   | +  | +  | +     | +  | +  | +       | +  | +  | +   | +  | +  | +   | +  | +  | +    | +  | +  |
| SM (OH) C16:1  | +    | +  | +  | +   | +  | +  | +     | +  | +  | +       | +  | +  | -   | +  | +  | +   | +  | +  | +    | +  | +  |
| SM (OH) C22:1  | +    | +  | +  | +   | +  | +  | +     | +  | +  | +       | +  | +  | -   | +  | +  | +   | +  | +  | +    | +  | +  |
| SM (OH) C22:2  | +    | +  | +  | +   | +  | +  | +     | +  | +  | +       | +  | +  | -   | +  | +  | +   | +  | +  | +    | +  | +  |
| SM (OH) C24:1  | +    | +  | +  | +   | +  | +  | +     | +  | +  | +       | +  | +  | -   | +  | +  | +   | +  | +  | +    | +  | +  |
| SM C16:0       | +    | +  | +  | +   | +  | +  | +     | +  | +  | +       | +  | +  | +   | +  | +  | +   | +  | +  | +    | +  | +  |
| SM C16:1       | +    | +  | +  | +   | +  | +  | +     | +  | +  | +       | +  | +  | +   | +  | +  | +   | +  | +  | +    | +  | +  |
| SM C18:0       | +    | +  | +  | +   | +  | +  | +     | +  | +  | +       | +  | +  | +   | +  | +  | +   | +  | +  | +    | +  | +  |

| Mtb      | KORA |    |    | NTR |    |    | EGCUT |    |    | TwinsUK |    |    | ERF |    |    | LLS |    |    | QIMR |    |    |
|----------|------|----|----|-----|----|----|-------|----|----|---------|----|----|-----|----|----|-----|----|----|------|----|----|
|          | C1   | C2 | C3 | C1  | C2 | C3 | C1    | C2 | C3 | C1      | C2 | C3 | C1  | C2 | C3 | C1  | C2 | C3 | C1   | C2 | C3 |
| SM C18:1 | +    | +  | +  | +   | +  | +  | +     | +  | +  | +       | +  | +  | +   | +  | +  | +   | +  | +  | +    | +  | +  |
| SM C20:2 | +    | +  | +  | +   | +  | +  | +     | +  | +  | +       | +  | +  | +   | +  | +  | +   | +  | +  | +    | +  | +  |
| SM C22:3 | -    | +  | -  | -   | -  | -  | -     | -  | -  | -       | +  | +  | -   | -  | -  | -   | +  | -  | +    | -  | -  |
| SM C24:0 | +    | +  | +  | +   | +  | +  | +     | +  | +  | +       | +  | +  | +   | +  | +  | +   | +  | +  | +    | +  | +  |
| SM C24:1 | +    | +  | +  | +   | +  | +  | +     | +  | +  | +       | +  | +  | +   | +  | +  | +   | +  | +  | +    | +  | +  |
| SM C26:0 | +    | +  | +  | +   | +  | +  | -     | +  | +  | +       | +  | +  | +   | +  | +  | +   | +  | +  | +    | +  | +  |
| SM C26:1 | +    | +  | +  | +   | +  | +  | +     | +  | +  | +       | +  | +  | +   | +  | +  | +   | +  | +  | +    | +  | +  |
| H1       | +    | +  | +  | +   | +  | +  | +     | +  | +  | +       | +  | +  | +   | +  | +  | +   | +  | +  | +    | +  | +  |

C1: Median(Concentration) > LOD, where LOD is limit of detection specified by Biocrates

C2: Excluded based on local QC of the metabolomics data.

C3:  $f(0) < 5\%$ , where  $f(0) = N(0)/\text{Samplesize}$ . For the Biocrates data set a value of exactly 0 is considered a missing value.

'+' : passed QC for this criterion; '-' : failed QC for this criterion

Supplementary Table 2: Complete partial correlation meta-analysis results of telomere length and metabolites

| metabolite | Model 1: age + sex |            |       |                       | Model 2: age + sex + BMI |            |       |                       | metabolite full name          |
|------------|--------------------|------------|-------|-----------------------|--------------------------|------------|-------|-----------------------|-------------------------------|
|            | n                  | direction* | r     | p-value               | n                        | direction* | r     | p-value               |                               |
| C0         | 7853               | +---++     | -0.01 | 0.502                 | 7638                     | ++---+     | -0.01 | 0.648                 | Carnitine                     |
| C10        | 3805               | +??????    | 0.01  | 0.421                 | 3790                     | +????+?    | 0.01  | 0.653                 | Decanoylcarnitine             |
| C10:1      | 6573               | -+?+++?    | 0.00  | 0.933                 | 6551                     | -+?+++     | 0.00  | 0.987                 | Decenoylcarnitine             |
| C10:2      | 6575               | -+?---?    | -0.02 | 0.066                 | 6553                     | -+?---     | -0.02 | 0.098                 | Decadienylcarnitine           |
| C12:1      | 7853               | +++---     | -0.01 | 0.300                 | 7638                     | +++--      | -0.01 | 0.365                 | Dodecenoylcarnitine           |
| C14:1      | 7852               | ++++++     | 0.00  | 0.775                 | 7637                     | +0---+     | -0.01 | 0.461                 | Tetradecenoylcarnitine        |
| C14:1-OH   | 1453               | ???-?+?    | -0.04 | 0.121                 | 1453                     | ???-?-     | -0.04 | 0.121                 | Hydroxytetradecenoylcarnitine |
| C14:2      | 6575               | -+?--+?    | 0.00  | 0.900                 | 6553                     | -+?--+     | -0.01 | 0.657                 | Tetradecadienylcarnitine      |
| C16:2      | 805                | ????-??    | -0.01 | 0.836                 | 805                      | ????-?     | -0.01 | 0.875                 | Hexadecadienylcarnitine       |
| C18:1      | 6769               | -+?+++     | -0.01 | 0.518                 | 6554                     | -+?--+     | -0.01 | 0.348                 | Octadecenoylcarnitine         |
| C18:2      | 7853               | ++++++     | 0.01  | 0.626                 | 7638                     | +++--+     | 0.00  | 0.933                 | Octadecadienylcarnitine       |
| C2         | 7853               | --++++     | -0.03 | 0.014                 | 7638                     | --+++      | -0.03 | 0.015                 | Acetylcarnitine               |
| C3         | 1448               | ????++?    | 0.01  | 0.780                 | 1448                     | ????++     | 0.01  | 0.758                 | Propionylcarnitine            |
| C3-OH      | 1449               | ????--?    | -0.10 | 2.64x10 <sup>-4</sup> | 1449                     | ????--     | -0.10 | 2.75x10 <sup>-4</sup> | Hydroxypropionylcarnitine     |
| C5:1-DC    | 2120               | ?+??-??    | 0.01  | 0.559                 | 2113                     | ?+??-?     | 0.01  | 0.516                 | Glutaconylcarnitine           |
| C7-DC      | 6576               | -+?---?    | -0.02 | 0.055                 | 6554                     | -+?---     | -0.03 | 0.017                 | Pimelylcarnitine              |
| C8         | 3804               | +??????    | 0.01  | 0.459                 | 3789                     | +????+?    | 0.01  | 0.625                 | Octanoylcarnitine             |
| C8:1       | 7853               | +++--+     | -0.01 | 0.440                 | 7638                     | +++--      | 0.00  | 0.916                 | Octenoylcarnitine             |
| C9         | 5262               | +??-++?    | 0.04  | 0.003                 | 5247                     | +??-++     | 0.04  | 0.011                 | Nonaylcarnitine               |
| Arg        | 6576               | +?-++-?    | 0.01  | 0.546                 | 6554                     | +?-++-     | 0.01  | 0.602                 | Arginine                      |
| Gln        | 7853               | ++++++     | 0.01  | 0.488                 | 7638                     | +--+++     | 0.00  | 0.847                 | Glutamine                     |
| Gly        | 7851               | +++---+    | 0.01  | 0.261                 | 7636                     | +0-++      | 0.00  | 0.828                 | Glycine                       |
| His        | 7853               | +++---+    | 0.01  | 0.562                 | 7638                     | +++--      | 0.00  | 0.834                 | Histidine                     |
| Met        | 7852               | -----+     | -0.04 | 9.20x10 <sup>-5</sup> | 7637                     | -----      | -0.05 | 7.51x10 <sup>-5</sup> | Methionine                    |
| Orn        | 7853               | +-----     | -0.01 | 0.611                 | 7638                     | +-----     | -0.01 | 0.527                 | Ornithine                     |
| Phe        | 7853               | --+---+    | -0.01 | 0.363                 | 7638                     | --+--      | -0.01 | 0.597                 | Phenylalanine                 |
| Pro        | 7852               | -----+     | -0.02 | 0.183                 | 7637                     | -----      | -0.01 | 0.230                 | Proline                       |
| Ser        | 7853               | ++++-++    | 0.02  | 0.081                 | 7638                     | ++++-+     | 0.01  | 0.202                 | Serine                        |
| Thr        | 5963               | -+?+?++    | 0.02  | 0.241                 | 5748                     | -+?+?+     | 0.01  | 0.340                 | Threonine                     |

| metabolite  | Model 1: age + sex |            |       |                       | Model 2: age + sex + BMI |            |       |                       | metabolite full name             |
|-------------|--------------------|------------|-------|-----------------------|--------------------------|------------|-------|-----------------------|----------------------------------|
|             | n                  | direction* | r     | p-value               | n                        | direction* | r     | p-value               |                                  |
| Trp         | 5963               | +?-?++     | -0.01 | 0.619                 | 5748                     | +?-?+      | -0.01 | 0.500                 | Tryptophan                       |
| Tyr         | 7047               | ----?+     | -0.04 | 2.14x10 <sup>-4</sup> | 6832                     | ----?-     | -0.04 | 8.91x10 <sup>-4</sup> | Tyrosine                         |
| Val         | 7047               | ----?++    | -0.01 | 0.541                 | 6829                     | +---?+     | 0.00  | 0.977                 | Valine                           |
| xLeu        | 7047               | ----?++    | -0.01 | 0.517                 | 6829                     | +---?+     | 0.00  | 0.952                 | Leucine / Isoleucine             |
| PC aa C24:0 | 4006               | -??-??+    | -0.02 | 0.290                 | 3798                     | -??-??     | -0.03 | 0.054                 | Phosphatidylcholine diacyl C24:0 |
| PC aa C28:1 | 7853               | ----+++    | -0.01 | 0.555                 | 7638                     | ----++     | -0.01 | 0.282                 | Phosphatidylcholine diacyl C28:1 |
| PC aa C30:0 | 7853               | ----+++    | -0.02 | 0.070                 | 7638                     | ----++     | -0.03 | 0.021                 | Phosphatidylcholine diacyl C30:0 |
| PC aa C32:0 | 7853               | ----+++    | -0.03 | 0.021                 | 7638                     | ----++     | -0.03 | 0.006                 | Phosphatidylcholine diacyl C32:0 |
| PC aa C32:1 | 7851               | ----++     | -0.04 | 2.44x10 <sup>-4</sup> | 7636                     | ----++     | -0.04 | 3.38x10 <sup>-4</sup> | Phosphatidylcholine diacyl C32:1 |
| PC aa C32:2 | 7853               | ----+++    | -0.01 | 0.352                 | 7638                     | ----++     | -0.02 | 0.188                 | Phosphatidylcholine diacyl C32:2 |
| PC aa C32:3 | 7853               | +-----     | 0.01  | 0.495                 | 7638                     | +-----     | 0.01  | 0.623                 | Phosphatidylcholine diacyl C32:3 |
| PC aa C34:1 | 7852               | ----+++    | -0.02 | 0.031                 | 7637                     | ----++     | -0.03 | 0.013                 | Phosphatidylcholine diacyl C34:1 |
| PC aa C34:2 | 7853               | -----      | -0.02 | 0.090                 | 7638                     | -----      | -0.02 | 0.038                 | Phosphatidylcholine diacyl C34:2 |
| PC aa C34:3 | 7853               | ----+++    | -0.02 | 0.065                 | 7638                     | ----++     | -0.02 | 0.033                 | Phosphatidylcholine diacyl C34:3 |
| PC aa C34:4 | 7853               | ----+++    | 0.00  | 0.753                 | 7638                     | ----++     | -0.01 | 0.625                 | Phosphatidylcholine diacyl C34:4 |
| PC aa C36:0 | 7853               | +-----     | 0.01  | 0.424                 | 7638                     | ----++     | 0.00  | 0.977                 | Phosphatidylcholine diacyl C36:0 |
| PC aa C36:1 | 7850               | ----+++    | -0.03 | 0.009                 | 7635                     | ----++     | -0.03 | 0.004                 | Phosphatidylcholine diacyl C36:1 |
| PC aa C36:2 | 7853               | -----      | -0.02 | 0.030                 | 7638                     | -----      | -0.03 | 0.010                 | Phosphatidylcholine diacyl C36:2 |
| PC aa C36:3 | 7852               | ----+++    | -0.02 | 0.063                 | 7637                     | ----++     | -0.02 | 0.053                 | Phosphatidylcholine diacyl C36:3 |
| PC aa C36:4 | 7853               | ----+++    | 0.00  | 0.913                 | 7638                     | ----++     | 0.00  | 0.840                 | Phosphatidylcholine diacyl C36:4 |
| PC aa C36:5 | 7849               | ----+++    | -0.01 | 0.508                 | 7634                     | ----++     | -0.01 | 0.229                 | Phosphatidylcholine diacyl C36:5 |
| PC aa C36:6 | 7851               | +-----     | 0.00  | 0.715                 | 7636                     | ----++     | 0.00  | 0.823                 | Phosphatidylcholine diacyl C36:6 |
| PC aa C38:0 | 7853               | ++-+++     | 0.01  | 0.355                 | 7638                     | --++       | 0.00  | 0.735                 | Phosphatidylcholine diacyl C38:0 |
| PC aa C38:1 | 836                | ?????++    | 0.08  | 0.026                 | 643                      | ?????+     | 0.05  | 0.173                 | Phosphatidylcholine diacyl C38:1 |
| PC aa C38:3 | 7852               | ----+++    | -0.03 | 0.007                 | 7637                     | ----++     | -0.02 | 0.035                 | Phosphatidylcholine diacyl C38:3 |
| PC aa C38:4 | 7851               | ----+++    | -0.01 | 0.514                 | 7636                     | ----++     | -0.01 | 0.646                 | Phosphatidylcholine diacyl C38:4 |
| PC aa C38:5 | 7850               | +-----     | -0.01 | 0.652                 | 7635                     | ----++     | -0.01 | 0.342                 | Phosphatidylcholine diacyl C38:5 |
| PC aa C38:6 | 7852               | +-----     | 0.00  | 0.987                 | 7637                     | +---+      | -0.01 | 0.611                 | Phosphatidylcholine diacyl C38:6 |
| PC aa C40:1 | 5770               | +0?+?-?    | 0.01  | 0.453                 | 5748                     | ++?+?-     | 0.00  | 0.740                 | Phosphatidylcholine diacyl C40:1 |
| PC aa C40:2 | 7849               | +-----     | 0.01  | 0.321                 | 7634                     | +-----     | 0.00  | 0.758                 | Phosphatidylcholine diacyl C40:2 |
| PC aa C40:3 | 7849               | ++----     | 0.00  | 0.852                 | 7634                     | ++----     | -0.01 | 0.435                 | Phosphatidylcholine diacyl C40:3 |

| metabolite  | Model 1: age + sex |            |       | Model 2: age + sex + BMI |      |            | metabolite full name |       |                                      |
|-------------|--------------------|------------|-------|--------------------------|------|------------|----------------------|-------|--------------------------------------|
|             | n                  | direction* | r     | p-value                  | n    | direction* |                      | r     | p-value                              |
| PC aa C40:4 | 7850               | ----+++    | -0.01 | 0.225                    | 7635 | ----++     | -0.01                | 0.255 | Phosphatidylcholine diacyl C40:4     |
| PC aa C40:5 | 7849               | ----+++    | -0.03 | 0.022                    | 7634 | ----++     | -0.03                | 0.017 | Phosphatidylcholine diacyl C40:5     |
| PC aa C40:6 | 7851               | ----++     | -0.02 | 0.073                    | 7636 | ----+      | -0.02                | 0.070 | Phosphatidylcholine diacyl C40:6     |
| PC aa C42:0 | 7853               | +++++++    | 0.03  | 0.020                    | 7638 | +++--      | 0.02                 | 0.089 | Phosphatidylcholine diacyl C42:0     |
| PC aa C42:1 | 7853               | ++-+++     | 0.02  | 0.086                    | 7638 | ++-++      | 0.01                 | 0.389 | Phosphatidylcholine diacyl C42:1     |
| PC aa C42:2 | 7849               | +++++++    | 0.01  | 0.236                    | 7634 | -0++++     | 0.00                 | 0.907 | Phosphatidylcholine diacyl C42:2     |
| PC aa C42:4 | 7853               | --++++     | 0.00  | 0.854                    | 7638 | --++++     | -0.01                | 0.599 | Phosphatidylcholine diacyl C42:4     |
| PC aa C42:5 | 7850               | --+++      | -0.02 | 0.152                    | 7635 | --++-      | -0.02                | 0.078 | Phosphatidylcholine diacyl C42:5     |
| PC aa C42:6 | 6764               | --?++      | 0.00  | 0.999                    | 6549 | --?+-      | -0.01                | 0.478 | Phosphatidylcholine diacyl C42:6     |
| PC ae C30:0 | 6769               | +?-+++     | 0.01  | 0.220                    | 6554 | --?++      | 0.00                 | 0.732 | Phosphatidylcholine acyl-alkyl C30:0 |
| PC ae C32:1 | 7853               | ----+++    | 0.00  | 0.756                    | 7638 | ----++     | -0.01                | 0.244 | Phosphatidylcholine acyl-alkyl C32:1 |
| PC ae C32:2 | 7853               | --++++     | 0.00  | 0.771                    | 7638 | --++++     | -0.01                | 0.306 | Phosphatidylcholine acyl-alkyl C32:2 |
| PC ae C34:0 | 7853               | +----++    | 0.00  | 0.755                    | 7638 | ----++     | -0.01                | 0.643 | Phosphatidylcholine acyl-alkyl C34:0 |
| PC ae C34:1 | 7852               | +----++    | 0.00  | 0.835                    | 7637 | ----++     | -0.01                | 0.579 | Phosphatidylcholine acyl-alkyl C34:1 |
| PC ae C34:2 | 7853               | +----++    | 0.01  | 0.204                    | 7638 | ----++     | 0.00                 | 0.808 | Phosphatidylcholine acyl-alkyl C34:2 |
| PC ae C34:3 | 7853               | --++++     | 0.01  | 0.538                    | 7638 | --++++     | -0.01                | 0.590 | Phosphatidylcholine acyl-alkyl C34:3 |
| PC ae C36:0 | 7852               | +----++    | 0.00  | 0.982                    | 7637 | ----++     | -0.01                | 0.460 | Phosphatidylcholine acyl-alkyl C36:0 |
| PC ae C36:1 | 7852               | ++-+++     | 0.03  | 0.007                    | 7637 | ++-++      | 0.02                 | 0.058 | Phosphatidylcholine acyl-alkyl C36:1 |
| PC ae C36:2 | 7853               | ++-+++     | 0.03  | 0.014                    | 7638 | ++-++      | 0.02                 | 0.132 | Phosphatidylcholine acyl-alkyl C36:2 |
| PC ae C36:3 | 7853               | +----++    | 0.01  | 0.301                    | 7638 | ----++     | 0.00                 | 0.789 | Phosphatidylcholine acyl-alkyl C36:3 |
| PC ae C36:4 | 7852               | +----++    | 0.01  | 0.240                    | 7637 | +----++    | 0.01                 | 0.401 | Phosphatidylcholine acyl-alkyl C36:4 |
| PC ae C36:5 | 7852               | ----+++    | 0.00  | 0.920                    | 7637 | ----++     | -0.01                | 0.635 | Phosphatidylcholine acyl-alkyl C36:5 |
| PC ae C38:0 | 7851               | ++-+++     | 0.01  | 0.567                    | 7636 | ++-+++     | 0.00                 | 0.828 | Phosphatidylcholine acyl-alkyl C38:0 |
| PC ae C38:1 | 6854               | +++?-?     | 0.01  | 0.250                    | 6829 | +++?-      | 0.01                 | 0.482 | Phosphatidylcholine acyl-alkyl C38:1 |
| PC ae C38:2 | 7853               | +++++++    | 0.02  | 0.099                    | 7638 | -++-+      | 0.01                 | 0.402 | Phosphatidylcholine acyl-alkyl C38:2 |
| PC ae C38:3 | 7852               | +++-+++    | 0.03  | 0.017                    | 7637 | +++-++     | 0.02                 | 0.036 | Phosphatidylcholine acyl-alkyl C38:3 |
| PC ae C38:4 | 7853               | ++-+++     | 0.04  | 9.04x10 <sup>-4</sup>    | 7638 | ++-+++     | 0.03                 | 0.005 | Phosphatidylcholine acyl-alkyl C38:4 |
| PC ae C38:5 | 7853               | ++-+++     | 0.01  | 0.251                    | 7638 | ++-+++     | 0.01                 | 0.510 | Phosphatidylcholine acyl-alkyl C38:5 |
| PC ae C38:6 | 7852               | +----++    | 0.01  | 0.543                    | 7637 | +----++    | 0.00                 | 0.967 | Phosphatidylcholine acyl-alkyl C38:6 |
| PC ae C40:1 | 7852               | ++-+++     | 0.02  | 0.073                    | 7637 | ++-+++     | 0.01                 | 0.402 | Phosphatidylcholine acyl-alkyl C40:1 |
| PC ae C40:2 | 7853               | ++-+++     | 0.02  | 0.069                    | 7638 | ++-+++     | 0.02                 | 0.147 | Phosphatidylcholine acyl-alkyl C40:2 |



| metabolite     | Model 1: age + sex |            |       |                       | Model 2: age + sex + BMI |            |       |                       | metabolite full name                 |
|----------------|--------------------|------------|-------|-----------------------|--------------------------|------------|-------|-----------------------|--------------------------------------|
|                | n                  | direction* | r     | p-value               | n                        | direction* | r     | p-value               |                                      |
| PC ae C40:3    | 7853               | +++++++    | 0.04  | 0.002                 | 7638                     | +++++      | 0.03  | 0.009                 | Phosphatidylcholine acyl-alkyl C40:3 |
| PC ae C40:4    | 7853               | +0+++++    | 0.03  | 0.004                 | 7638                     | +-----     | 0.03  | 0.028                 | Phosphatidylcholine acyl-alkyl C40:4 |
| PC ae C40:5    | 7853               | +-----     | 0.04  | 0.002                 | 7638                     | +-----     | 0.03  | 0.019                 | Phosphatidylcholine acyl-alkyl C40:5 |
| PC ae C40:6    | 7853               | +-----     | 0.03  | 0.009                 | 7638                     | +-----     | 0.02  | 0.085                 | Phosphatidylcholine acyl-alkyl C40:6 |
| PC ae C42:0    | 6768               | +0?+--     | 0.00  | 0.841                 | 6553                     | -+?+-      | 0.00  | 0.805                 | Phosphatidylcholine acyl-alkyl C42:0 |
| PC ae C42:1    | 7852               | --+---     | 0.01  | 0.246                 | 7637                     | -0+---     | 0.01  | 0.610                 | Phosphatidylcholine acyl-alkyl C42:1 |
| PC ae C42:2    | 7852               | +-----     | 0.01  | 0.285                 | 7637                     | --+---     | 0.00  | 0.906                 | Phosphatidylcholine acyl-alkyl C42:2 |
| PC ae C42:3    | 7853               | +++++++    | 0.02  | 0.052                 | 7638                     | +++++      | 0.01  | 0.414                 | Phosphatidylcholine acyl-alkyl C42:3 |
| PC ae C42:4    | 7853               | +-----     | 0.02  | 0.035                 | 7638                     | +-----     | 0.01  | 0.209                 | Phosphatidylcholine acyl-alkyl C42:4 |
| PC ae C42:5    | 6769               | +?+---     | 0.02  | 0.084                 | 6554                     | +?+---     | 0.01  | 0.290                 | Phosphatidylcholine acyl-alkyl C42:5 |
| PC ae C44:3    | 7853               | --+---     | 0.02  | 0.111                 | 7638                     | -0+---     | 0.01  | 0.518                 | Phosphatidylcholine acyl-alkyl C44:3 |
| PC ae C44:4    | 7852               | +-----     | 0.01  | 0.418                 | 7637                     | +-----     | 0.00  | 0.994                 | Phosphatidylcholine acyl-alkyl C44:4 |
| PC ae C44:5    | 7853               | +-----     | 0.01  | 0.212                 | 7638                     | +-----     | 0.01  | 0.527                 | Phosphatidylcholine acyl-alkyl C44:5 |
| PC ae C44:6    | 7852               | ++++-+     | 0.02  | 0.099                 | 7637                     | ++++-+     | 0.01  | 0.353                 | Phosphatidylcholine acyl-alkyl C44:6 |
| lysoPC a C16:0 | 7853               | +++++      | 0.02  | 0.120                 | 7638                     | +++++      | 0.01  | 0.417                 | lysoPhosphatidylcholine acyl C16:0   |
| lysoPC a C16:1 | 7851               | -+---+     | -0.01 | 0.368                 | 7636                     | -+---+     | -0.01 | 0.207                 | lysoPhosphatidylcholine acyl C16:1   |
| lysoPC a C17:0 | 7853               | +++++      | 0.05  | 7.10x10 <sup>-6</sup> | 7638                     | +++++      | 0.04  | 4.72x10 <sup>-4</sup> | lysoPhosphatidylcholine acyl C17:0   |
| lysoPC a C18:0 | 7853               | +++++      | 0.02  | 0.096                 | 7638                     | +0---+     | 0.01  | 0.332                 | lysoPhosphatidylcholine acyl C18:0   |
| lysoPC a C18:1 | 7853               | +++++      | 0.01  | 0.264                 | 7638                     | -0---+     | 0.00  | 0.771                 | lysoPhosphatidylcholine acyl C18:1   |
| lysoPC a C18:2 | 7851               | ++++-+     | 0.02  | 0.154                 | 7636                     | -+---+     | 0.00  | 0.872                 | lysoPhosphatidylcholine acyl C18:2   |
| lysoPC a C20:3 | 7853               | -+---+     | 0.00  | 0.956                 | 7638                     | -+---+     | -0.01 | 0.620                 | lysoPhosphatidylcholine acyl C20:3   |
| lysoPC a C20:4 | 7853               | ++++-+     | 0.02  | 0.065                 | 7638                     | ++++-+     | 0.01  | 0.314                 | lysoPhosphatidylcholine acyl C20:4   |
| lysoPC a C26:0 | 1314               | ?+?????    | 0.02  | 0.565                 | 1307                     | ?+?????    | 0.02  | 0.457                 | lysoPhosphatidylcholine acyl C26:0   |
| lysoPC a C28:0 | 6766               | -0?+--     | -0.01 | 0.447                 | 6551                     | -+?+-      | -0.02 | 0.175                 | lysoPhosphatidylcholine acyl C28:0   |
| lysoPC a C28:1 | 7852               | +++---     | 0.02  | 0.096                 | 7637                     | -+---+     | 0.01  | 0.279                 | lysoPhosphatidylcholine acyl C28:1   |
| SM (OH) C14:1  | 7853               | +-----     | 0.02  | 0.079                 | 7638                     | +-----     | 0.01  | 0.331                 | Hydroxysphingomyeline C14:1          |
| SM (OH) C16:1  | 7047               | +--?++     | 0.03  | 0.011                 | 6832                     | +--?++     | 0.02  | 0.053                 | Hydroxysphingomyeline C16:1          |
| SM (OH) C22:1  | 7047               | +0++?++    | 0.02  | 0.129                 | 6829                     | +--?++     | 0.01  | 0.310                 | Hydroxysphingomyeline C22:1          |
| SM (OH) C22:2  | 7047               | +--?++     | 0.02  | 0.051                 | 6829                     | +--?++     | 0.02  | 0.213                 | Hydroxysphingomyeline C22:2          |
| SM (OH) C24:1  | 7047               | +0--?++    | 0.01  | 0.209                 | 6829                     | +--?++     | 0.01  | 0.457                 | Hydroxysphingomyeline C24:1          |
| SM C16:0       | 7853               | --+---     | 0.00  | 0.864                 | 7638                     | --+---     | -0.01 | 0.330                 | Sphingomyeline C16:0                 |

| metabolite | Model 1: age + sex |            |       |         | Model 2: age + sex + BMI |            |       |         | metabolite full name |
|------------|--------------------|------------|-------|---------|--------------------------|------------|-------|---------|----------------------|
|            | n                  | direction* | r     | p-value | n                        | direction* | r     | p-value |                      |
| SM C16:1   | 7853               | --+----    | -0.02 | 0.066   | 7638                     | --+----    | -0.02 | 0.074   | Sphingomyeline C16:1 |
| SM C18:0   | 7853               | --+----    | 0.00  | 0.933   | 7638                     | +--+---    | 0.00  | 0.864   | Sphingomyeline C18:0 |
| SM C18:1   | 7853               | --+----    | 0.00  | 0.822   | 7638                     | +--+---    | 0.01  | 0.598   | Sphingomyeline C18:1 |
| SM C20:2   | 7853               | +--+---    | 0.03  | 0.002   | 7638                     | +--+---    | 0.03  | 0.003   | Sphingomyeline C20:2 |
| SM C24:0   | 7852               | --+----    | 0.00  | 0.906   | 7637                     | --+----    | -0.01 | 0.657   | Sphingomyeline C24:0 |
| SM C24:1   | 7853               | --+----    | -0.01 | 0.402   | 7638                     | --+----    | -0.01 | 0.236   | Sphingomyeline C24:1 |
| SM C26:0   | 5454               | +??-+---   | 0.03  | 0.043   | 5246                     | +??-+---   | 0.02  | 0.229   | Sphingomyeline C26:0 |
| SM C26:1   | 6539               | +?+++++    | 0.01  | 0.241   | 6328                     | -?+---     | 0.01  | 0.604   | Sphingomyeline C26:1 |
| H1         | 7851               | ----+--    | -0.02 | 0.073   | 7636                     | ----+--    | -0.01 | 0.363   | Hexose               |

\*Order of cohorts in direction column: KORA, NTR, EGCUT, TwinsUK, ERF, LLS, QIMR; Direction of effect represented by - (negative correlation) + (positive correlation) , ? (not included), or not available (0) for each study.

Supplementary Table 3: Study-specific results for age- and sex-adjusted model

| metabolite     | KORA (N=3003) |                       | NTR (N=1314) |         | EGCUT (N=1084) |         | TwinsUK (N=810) |         | ERF (N=806) |                       | LLS (N=643) |         | QIMR (N=193) |         |
|----------------|---------------|-----------------------|--------------|---------|----------------|---------|-----------------|---------|-------------|-----------------------|-------------|---------|--------------|---------|
|                | r             | p-value               | r            | p-value | r              | p-value | r               | p-value | r           | p-value               | r           | p-value | r            | p-value |
| lysoPC a C17:0 | 0.08          | 8.19x10 <sup>-6</sup> | 0.07         | 0.016   | -0.02          | 0.455   | 0.01            | 0.873   | 0.02        | 0.597                 | 0.08        | 0.032   | 0.09         | 0.234   |
| Met            | -0.05         | 0.006                 | -0.04        | 0.157   | -0.01          | 0.708   | -0.01           | 0.887   | -0.13       | 1.26x10 <sup>-4</sup> | -0.04       | 0.300   | 0.04         | 0.537   |
| Tyr            | -0.05         | 0.005                 | -0.06        | 0.023   | -0.02          | 0.606   | -0.05           | 0.188   | NA          | NA                    | -0.04       | 0.286   | 0.05         | 0.521   |
| PC aa C32:1    | -0.06         | 0.001                 | -0.05        | 0.087   | -0.04          | 0.163   | -0.06           | 0.069   | 0.00        | 0.925                 | 0.00        | 0.989   | 0.05         | 0.494   |
| C3-OH          | NA            | NA                    | NA           | NA      | NA             | NA      | NA              | NA      | -0.15       | 3.11x10 <sup>-5</sup> | -0.03       | 0.420   | NA           | NA      |
| PC ae C38:4    | 0.05          | 0.003                 | -0.01        | 0.723   | 0.00           | 0.920   | -0.01           | 0.746   | 0.06        | 0.112                 | 0.13        | 0.001   | 0.11         | 0.141   |
| PC ae C40:3    | 0.04          | 0.041                 | 0.00         | 0.918   | 0.03           | 0.280   | 0.01            | 0.875   | 0.07        | 0.048                 | 0.08        | 0.049   | 0.09         | 0.193   |
| PC ae C40:5    | 0.05          | 0.009                 | -0.01        | 0.798   | 0.01           | 0.648   | 0.02            | 0.641   | 0.05        | 0.170                 | 0.09        | 0.025   | 0.09         | 0.227   |
| SM C20:2       | 0.02          | 0.190                 | -0.04        | 0.128   | 0.07           | 0.029   | -0.02           | 0.667   | 0.21        | 1.04x10 <sup>-9</sup> | 0.00        | 0.937   | 0.09         | 0.224   |
| C9             | 0.06          | 0.003                 | NA           | NA      | NA             | NA      | -0.03           | 0.374   | 0.03        | 0.346                 | 0.08        | 0.052   | NA           | NA      |
| PC ae C40:4    | 0.04          | 0.021                 | 0.00         | 1.000   | 0.01           | 0.654   | 0.01            | 0.834   | 0.03        | 0.452                 | 0.11        | 0.006   | 0.09         | 0.237   |
| PC aa C38:3    | -0.04         | 0.024                 | -0.05        | 0.071   | -0.02          | 0.493   | -0.09           | 0.013   | 0.02        | 0.518                 | 0.03        | 0.483   | 0.04         | 0.553   |
| PC ae C36:1    | 0.03          | 0.071                 | -0.01        | 0.798   | 0.00           | 0.894   | -0.01           | 0.718   | 0.06        | 0.077                 | 0.12        | 0.003   | 0.15         | 0.035   |
| PC aa C36:1    | -0.05         | 0.013                 | -0.07        | 0.016   | -0.03          | 0.283   | -0.06           | 0.092   | 0.03        | 0.359                 | 0.05        | 0.199   | 0.09         | 0.210   |
| PC ae C40:6    | 0.05          | 0.005                 | -0.01        | 0.819   | 0.01           | 0.832   | -0.01           | 0.781   | 0.05        | 0.176                 | 0.04        | 0.281   | 0.10         | 0.147   |
| SM (OH) C16:1  | 0.05          | 0.010                 | -0.02        | 0.507   | 0.02           | 0.571   | -0.01           | 0.861   | NA          | NA                    | 0.09        | 0.021   | 0.12         | 0.102   |
| C2             | -0.03         | 0.143                 | -0.06        | 0.020   | 0.03           | 0.378   | -0.08           | 0.018   | -0.01       | 0.747                 | -0.02       | 0.593   | 0.04         | 0.603   |
| PC ae C36:2    | 0.03          | 0.062                 | 0.00         | 0.913   | -0.01          | 0.750   | -0.01           | 0.792   | 0.06        | 0.104                 | 0.09        | 0.017   | 0.12         | 0.088   |
| PC ae C38:3    | 0.03          | 0.105                 | 0.00         | 0.892   | 0.01           | 0.702   | -0.03           | 0.477   | 0.06        | 0.092                 | 0.09        | 0.020   | 0.10         | 0.165   |
| PC aa C42:0    | 0.03          | 0.155                 | 0.01         | 0.692   | 0.06           | 0.037   | 0.00            | 0.968   | 0.02        | 0.662                 | 0.04        | 0.364   | 0.05         | 0.515   |
| PC aa C32:0    | -0.05         | 0.005                 | -0.06        | 0.036   | -0.03          | 0.360   | -0.03           | 0.451   | 0.04        | 0.222                 | 0.05        | 0.234   | 0.07         | 0.324   |
| PC aa C40:5    | -0.03         | 0.074                 | -0.06        | 0.039   | -0.03          | 0.396   | -0.05           | 0.137   | 0.02        | 0.505                 | 0.01        | 0.836   | 0.08         | 0.262   |
| PC aa C38:1    | NA            | NA                    | NA           | NA      | NA             | NA      | NA              | NA      | NA          | NA                    | 0.06        | 0.134   | 0.14         | 0.057   |
| PC aa C36:2    | -0.04         | 0.051                 | -0.07        | 0.014   | -0.02          | 0.563   | -0.03           | 0.344   | -0.01       | 0.854                 | 0.05        | 0.170   | 0.10         | 0.154   |
| PC aa C34:1    | -0.03         | 0.066                 | -0.05        | 0.056   | -0.05          | 0.131   | -0.04           | 0.205   | 0.00        | 0.954                 | 0.07        | 0.091   | 0.11         | 0.140   |
| PC ae C42:4    | 0.04          | 0.049                 | -0.01        | 0.654   | 0.04           | 0.169   | 0.01            | 0.821   | 0.00        | 0.895                 | 0.04        | 0.292   | 0.07         | 0.366   |
| SM C26:0       | 0.03          | 0.075                 | NA           | NA      | NA             | NA      | -0.03           | 0.424   | 0.05        | 0.170                 | 0.01        | 0.744   | 0.14         | 0.048   |
| SM (OH) C22:2  | 0.03          | 0.144                 | -0.01        | 0.786   | 0.01           | 0.754   | 0.00            | 0.946   | NA          | NA                    | 0.09        | 0.016   | 0.13         | 0.078   |
| PC ae C42:3    | 0.02          | 0.201                 | 0.01         | 0.699   | 0.03           | 0.337   | 0.01            | 0.727   | 0.01        | 0.837                 | 0.03        | 0.505   | 0.12         | 0.085   |

| metabolite     | KORA (N=3003) |         | NTR (N=1314) |         | EGCUT (N=1084) |         | TwinsUK (N=810) |         | ERF (N=806) |         | LLS (N=643) |         | QIMR (N=193) |         |
|----------------|---------------|---------|--------------|---------|----------------|---------|-----------------|---------|-------------|---------|-------------|---------|--------------|---------|
|                | r             | p-value | r            | p-value | r              | p-value | r               | p-value | r           | p-value | r           | p-value | r            | p-value |
| C7-DC          | -0.02         | 0.368   | 0.03         | 0.216   | NA             | NA      | -0.09           | 0.008   | -0.06       | 0.074   | -0.04       | 0.331   | NA           | NA      |
| PC aa C36:3    | -0.04         | 0.050   | -0.04        | 0.152   | -0.03          | 0.300   | -0.05           | 0.127   | 0.00        | 0.890   | 0.08        | 0.048   | 0.09         | 0.193   |
| lysoPC a C20:4 | 0.02          | 0.180   | 0.02         | 0.552   | 0.01           | 0.834   | 0.01            | 0.747   | -0.03       | 0.469   | 0.07        | 0.066   | 0.14         | 0.055   |
| PC aa C34:3    | -0.03         | 0.076   | -0.03        | 0.223   | -0.03          | 0.274   | -0.03           | 0.361   | 0.02        | 0.623   | 0.02        | 0.578   | 0.06         | 0.392   |
| SM C16:1       | -0.04         | 0.015   | -0.07        | 0.013   | 0.01           | 0.765   | -0.04           | 0.249   | 0.03        | 0.375   | 0.07        | 0.088   | 0.08         | 0.250   |
| C10:2          | -0.03         | 0.115   | 0.04         | 0.127   | NA             | NA      | -0.09           | 0.007   | -0.01       | 0.872   | -0.06       | 0.144   | NA           | NA      |
| PC ae C40:2    | 0.03          | 0.091   | -0.01        | 0.772   | 0.01           | 0.699   | 0.00            | 0.945   | 0.02        | 0.655   | 0.06        | 0.148   | 0.08         | 0.281   |
| PC aa C30:0    | -0.04         | 0.018   | -0.06        | 0.034   | -0.04          | 0.177   | -0.01           | 0.716   | 0.06        | 0.075   | 0.06        | 0.158   | 0.08         | 0.288   |
| H1             | -0.02         | 0.173   | -0.03        | 0.263   | -0.01          | 0.654   | -0.04           | 0.275   | 0.02        | 0.555   | 0.00        | 1.000   | -0.08        | 0.287   |
| PC aa C40:6    | -0.02         | 0.308   | -0.04        | 0.109   | -0.03          | 0.343   | -0.05           | 0.179   | 0.05        | 0.164   | -0.05       | 0.248   | 0.08         | 0.294   |
| PC ae C40:1    | 0.02          | 0.279   | 0.00         | 0.904   | 0.02           | 0.601   | 0.02            | 0.639   | -0.01       | 0.850   | 0.07        | 0.067   | 0.17         | 0.020   |
| SM (OH) C14:1  | 0.02          | 0.180   | -0.03        | 0.278   | -0.01          | 0.783   | 0.00            | 0.972   | 0.05        | 0.168   | 0.09        | 0.020   | 0.17         | 0.017   |
| Ser            | 0.01          | 0.711   | 0.04         | 0.198   | 0.00           | 0.918   | 0.02            | 0.555   | -0.02       | 0.563   | 0.10        | 0.013   | 0.11         | 0.129   |
| PC ae C42:5    | 0.04          | 0.047   | -0.02        | 0.398   | NA             | NA      | 0.01            | 0.739   | 0.02        | 0.616   | 0.05        | 0.186   | 0.03         | 0.629   |
| PC aa C42:1    | 0.02          | 0.245   | 0.00         | 0.909   | 0.03           | 0.278   | -0.01           | 0.786   | 0.02        | 0.520   | 0.04        | 0.288   | 0.10         | 0.162   |
| PC aa C34:2    | -0.03         | 0.170   | -0.06        | 0.044   | -0.02          | 0.563   | -0.02           | 0.577   | -0.05       | 0.123   | 0.09        | 0.027   | 0.11         | 0.132   |
| lysoPC a C18:0 | 0.03          | 0.063   | 0.01         | 0.856   | -0.01          | 0.821   | 0.00            | 0.975   | 0.01        | 0.727   | 0.04        | 0.262   | 0.05         | 0.513   |
| lysoPC a C28:1 | 0.00          | 0.840   | 0.00         | 0.918   | 0.02           | 0.556   | -0.03           | 0.454   | 0.09        | 0.007   | 0.03        | 0.428   | 0.20         | 0.006   |
| PC ae C44:6    | 0.02          | 0.186   | 0.01         | 0.779   | 0.04           | 0.192   | 0.00            | 0.888   | -0.01       | 0.812   | 0.03        | 0.517   | 0.04         | 0.620   |
| PC ae C38:2    | 0.01          | 0.736   | 0.01         | 0.819   | 0.01           | 0.740   | 0.00            | 0.990   | 0.04        | 0.222   | 0.08        | 0.045   | 0.12         | 0.105   |
| PC ae C44:3    | -0.01         | 0.566   | 0.00         | 0.924   | 0.03           | 0.309   | 0.01            | 0.800   | 0.08        | 0.030   | 0.06        | 0.132   | 0.19         | 0.010   |
| lysoPC a C16:0 | 0.02          | 0.296   | 0.03         | 0.319   | -0.01          | 0.662   | 0.00            | 0.890   | 0.02        | 0.666   | 0.05        | 0.223   | 0.06         | 0.389   |
| C14:1-OH       | NA            | NA      | NA           | NA      | NA             | NA      | -0.07           | 0.034   | NA          | NA      | 0.00        | 0.964   | NA           | NA      |
| SM (OH) C22:1  | 0.01          | 0.613   | NA           | 1.000   | 0.01           | 0.629   | 0.00            | 0.890   | NA          | NA      | 0.10        | 0.015   | 0.10         | 0.185   |
| PC aa C42:5    | -0.03         | 0.085   | -0.01        | 0.692   | 0.01           | 0.787   | -0.03           | 0.434   | 0.03        | 0.373   | -0.06       | 0.101   | 0.06         | 0.401   |
| lysoPC a C18:2 | 0.01          | 0.476   | 0.02         | 0.507   | 0.01           | 0.839   | 0.02            | 0.533   | -0.04       | 0.229   | 0.07        | 0.067   | 0.14         | 0.057   |
| Pro            | -0.01         | 0.614   | -0.03        | 0.321   | -0.02          | 0.523   | -0.03           | 0.344   | 0.00        | 0.952   | -0.03       | 0.428   | 0.08         | 0.269   |
| PC ae C34:2    | 0.01          | 0.551   | -0.02        | 0.477   | -0.01          | 0.690   | -0.01           | 0.728   | 0.04        | 0.291   | 0.11        | 0.004   | 0.14         | 0.061   |
| SM (OH) C24:1  | 0.01          | 0.620   | NA           | 1.000   | 0.02           | 0.412   | 0.00            | 0.966   | NA          | NA      | 0.06        | 0.107   | 0.06         | 0.396   |
| PC ae C44:5    | 0.02          | 0.233   | -0.02        | 0.504   | 0.05           | 0.115   | -0.02           | 0.562   | -0.02       | 0.631   | 0.06        | 0.113   | 0.04         | 0.596   |
| PC ae C30:0    | 0.01          | 0.616   | -0.01        | 0.609   | NA             | NA      | -0.02           | 0.663   | 0.05        | 0.137   | 0.06        | 0.119   | 0.12         | 0.101   |

| metabolite     | KORA (N=3003) |         | NTR (N=1314) |         | EGCUT (N=1084) |         | TwinsUK (N=810) |         | ERF (N=806) |         | LLS (N=643) |         | QIMR (N=193) |         |
|----------------|---------------|---------|--------------|---------|----------------|---------|-----------------|---------|-------------|---------|-------------|---------|--------------|---------|
|                | r             | p-value | r            | p-value | r              | p-value | r               | p-value | r           | p-value | r           | p-value | r            | p-value |
| PC aa C40:4    | -0.04         | 0.036   | -0.03        | 0.346   | 0.00           | 0.901   | -0.05           | 0.156   | 0.06        | 0.087   | 0.04        | 0.352   | 0.08         | 0.296   |
| PC aa C42:2    | 0.00          | 0.838   | 0.00         | 0.913   | 0.02           | 0.581   | 0.02            | 0.590   | 0.00        | 0.922   | 0.04        | 0.344   | 0.15         | 0.032   |
| PC ae C36:4    | 0.01          | 0.643   | -0.03        | 0.219   | -0.01          | 0.744   | -0.01           | 0.753   | 0.05        | 0.194   | 0.13        | 0.001   | 0.13         | 0.066   |
| Thr            | 0.00          | 0.935   | 0.01         | 0.819   | NA             | NA      | 0.02            | 0.598   | NA          | NA      | 0.09        | 0.018   | 0.06         | 0.391   |
| SM C26:1       | 0.00          | 0.858   | NA           | NA      | 0.02           | 0.588   | 0.00            | 0.981   | 0.05        | 0.199   | 0.01        | 0.720   | 0.11         | 0.131   |
| PC ae C42:1    | -0.01         | 0.614   | 0.00         | 0.904   | 0.04           | 0.194   | 0.00            | 0.902   | 0.05        | 0.174   | 0.04        | 0.356   | 0.17         | 0.015   |
| PC ae C38:1    | 0.03          | 0.122   | -0.01        | 0.764   | 0.02           | 0.485   | 0.02            | 0.510   | NA          | NA      | -0.03       | 0.422   | NA           | NA      |
| PC ae C38:5    | 0.02          | 0.313   | -0.05        | 0.098   | 0.00           | 0.914   | -0.01           | 0.711   | 0.04        | 0.278   | 0.10        | 0.014   | 0.11         | 0.143   |
| Gly            | 0.03          | 0.132   | 0.01         | 0.654   | -0.02          | 0.607   | 0.01            | 0.770   | -0.01       | 0.807   | 0.02        | 0.642   | 0.02         | 0.742   |
| lysoPC a C18:1 | 0.02          | 0.400   | 0.02         | 0.559   | -0.01          | 0.727   | -0.01           | 0.776   | -0.02       | 0.516   | 0.07        | 0.060   | 0.11         | 0.112   |
| PC ae C42:2    | 0.00          | 0.793   | 0.00         | 0.896   | 0.03           | 0.316   | 0.00            | 0.989   | -0.01       | 0.825   | 0.05        | 0.205   | 0.14         | 0.055   |
| PC aa C24:0    | -0.03         | 0.072   | NA           | NA      | NA             | NA      | -0.02           | 0.562   | NA          | NA      | NA          | NA      | 0.25         | 0.001   |
| C12:1          | -0.01         | 0.616   | 0.03         | 0.339   | 0.00           | 0.985   | -0.09           | 0.011   | 0.00        | 0.900   | -0.01       | 0.797   | -0.13        | 0.082   |
| PC ae C36:3    | 0.01          | 0.553   | -0.02        | 0.400   | -0.01          | 0.786   | -0.03           | 0.447   | 0.05        | 0.183   | 0.10        | 0.012   | 0.10         | 0.185   |
| PC aa C40:2    | 0.00          | 0.994   | 0.00         | 0.909   | 0.04           | 0.239   | 0.00            | 0.893   | 0.01        | 0.843   | 0.02        | 0.697   | 0.14         | 0.058   |
| PC aa C32:2    | -0.02         | 0.208   | -0.02        | 0.502   | -0.04          | 0.243   | -0.03           | 0.343   | 0.06        | 0.091   | 0.01        | 0.710   | 0.10         | 0.171   |
| PC aa C38:0    | 0.01          | 0.742   | -0.01        | 0.707   | 0.02           | 0.608   | -0.02           | 0.625   | 0.04        | 0.236   | 0.03        | 0.397   | 0.10         | 0.159   |
| Phe            | -0.01         | 0.498   | -0.04        | 0.168   | 0.02           | 0.593   | -0.04           | 0.243   | 0.02        | 0.630   | 0.00        | 0.959   | 0.05         | 0.477   |
| lysoPC a C16:1 | -0.01         | 0.519   | 0.01         | 0.749   | -0.02          | 0.603   | -0.05           | 0.163   | 0.01        | 0.853   | -0.02       | 0.601   | 0.05         | 0.521   |
| SM C24:1       | -0.03         | 0.146   | -0.02        | 0.425   | 0.01           | 0.651   | -0.01           | 0.788   | 0.00        | 0.987   | 0.03        | 0.399   | 0.03         | 0.650   |
| PC ae C44:4    | 0.02          | 0.360   | -0.01        | 0.610   | 0.05           | 0.075   | -0.01           | 0.686   | -0.03       | 0.428   | 0.01        | 0.758   | 0.04         | 0.581   |
| C10            | 0.01          | 0.506   | NA           | NA      | NA             | NA      | -0.07           | 0.037   | 0.02        | 0.639   | NA          | NA      | NA           | NA      |
| PC aa C36:0    | 0.00          | 0.843   | -0.01        | 0.717   | 0.00           | 0.994   | -0.02           | 0.643   | 0.04        | 0.265   | 0.03        | 0.431   | 0.18         | 0.011   |
| C8:1           | -0.01         | 0.757   | 0.02         | 0.562   | 0.01           | 0.848   | -0.06           | 0.106   | -0.02       | 0.519   | 0.01        | 0.877   | -0.10        | 0.183   |
| lysoPC a C28:0 | -0.02         | 0.382   | NA           | 1.000   | NA             | NA      | -0.04           | 0.296   | 0.04        | 0.244   | -0.08       | 0.034   | 0.19         | 0.009   |
| PC aa C40:1    | 0.02          | 0.370   | NA           | 1.000   | NA             | NA      | 0.01            | 0.733   | NA          | NA      | 0.00        | 0.945   | NA           | NA      |
| C8             | 0.01          | 0.498   | NA           | NA      | NA             | NA      | -0.09           | 0.014   | 0.01        | 0.762   | NA          | NA      | NA           | NA      |
| Gln            | 0.04          | 0.029   | -0.09        | 0.002   | 0.00           | 0.918   | -0.02           | 0.481   | 0.02        | 0.597   | 0.08        | 0.034   | 0.05         | 0.521   |
| PC aa C32:3    | 0.00          | 0.934   | -0.04        | 0.150   | -0.01          | 0.802   | -0.03           | 0.466   | 0.10        | 0.007   | 0.07        | 0.092   | 0.09         | 0.209   |
| C0             | 0.00          | 0.938   | 0.02         | 0.440   | -0.02          | 0.566   | -0.07           | 0.063   | -0.03       | 0.368   | 0.01        | 0.876   | 0.05         | 0.464   |
| PC aa C36:5    | 0.00          | 0.844   | -0.02        | 0.517   | -0.06          | 0.063   | 0.00            | 0.888   | 0.01        | 0.785   | 0.00        | 0.984   | 0.17         | 0.018   |

| metabolite     | KORA (N=3003) |         | NTR (N=1314) |         | EGCUT (N=1084) |         | TwinsUK (N=810) |         | ERF (N=806) |         | LLS (N=643) |         | QIMR (N=193) |         |
|----------------|---------------|---------|--------------|---------|----------------|---------|-----------------|---------|-------------|---------|-------------|---------|--------------|---------|
|                | r             | p-value | r            | p-value | r              | p-value | r               | p-value | r           | p-value | r           | p-value | r            | p-value |
| PC aa C38:4    | -0.01         | 0.498   | -0.05        | 0.083   | -0.01          | 0.706   | -0.04           | 0.228   | 0.04        | 0.267   | 0.06        | 0.145   | 0.11         | 0.141   |
| xLeu           | -0.01         | 0.626   | -0.03        | 0.269   | 0.00           | 0.947   | -0.02           | 0.612   | NA          | NA      | 0.03        | 0.399   | 0.04         | 0.581   |
| C18:1          | -0.01         | 0.532   | 0.00         | 0.892   | NA             | NA      | -0.07           | 0.063   | 0.00        | 0.937   | -0.01       | 0.798   | 0.17         | 0.016   |
| PC ae C34:3    | -0.01         | 0.424   | -0.02        | 0.559   | 0.00           | 0.887   | 0.01            | 0.863   | 0.05        | 0.157   | 0.08        | 0.047   | 0.10         | 0.156   |
| Val            | -0.01         | 0.515   | -0.03        | 0.250   | -0.01          | 0.823   | -0.01           | 0.702   | NA          | NA      | 0.05        | 0.242   | 0.08         | 0.284   |
| PC ae C38:6    | 0.01          | 0.619   | -0.04        | 0.169   | -0.01          | 0.664   | -0.02           | 0.614   | 0.05        | 0.129   | 0.05        | 0.175   | 0.14         | 0.045   |
| Arg            | 0.02          | 0.301   | -0.04        | 0.180   | NA             | NA      | 0.01            | 0.825   | 0.05        | 0.187   | 0.00        | 0.913   | NA           | NA      |
| PC aa C28:1    | -0.01         | 0.651   | -0.08        | 0.004   | -0.02          | 0.461   | -0.01           | 0.719   | 0.04        | 0.208   | 0.07        | 0.088   | 0.17         | 0.021   |
| C5:1-DC        | NA            | NA      | 0.02         | 0.373   | NA             | NA      | -0.04           | 0.234   | -0.01       | 0.849   | NA          | NA      | NA           | NA      |
| His            | 0.03          | 0.159   | -0.04        | 0.106   | 0.00           | 0.892   | 0.05            | 0.155   | -0.06       | 0.114   | 0.04        | 0.362   | 0.10         | 0.181   |
| lysoPC a C26:0 | NA            | NA      | 0.02         | 0.565   | NA             | NA      | NA              | NA      | NA          | NA      | NA          | NA      | NA           | NA      |
| PC ae C38:0    | 0.01          | 0.546   | 0.01         | 0.806   | -0.03          | 0.407   | -0.01           | 0.709   | 0.02        | 0.639   | 0.01        | 0.823   | 0.14         | 0.045   |
| Orn            | 0.01          | 0.676   | -0.06        | 0.037   | 0.01           | 0.706   | -0.03           | 0.411   | -0.03       | 0.336   | 0.04        | 0.316   | 0.11         | 0.141   |
| Trp            | 0.00          | 0.913   | -0.05        | 0.084   | NA             | NA      | 0.00            | 0.902   | NA          | NA      | 0.02        | 0.604   | 0.05         | 0.534   |
| C18:2          | 0.00          | 0.987   | 0.00         | 0.929   | 0.04           | 0.176   | -0.03           | 0.360   | -0.02       | 0.545   | 0.01        | 0.842   | 0.18         | 0.013   |
| PC aa C38:5    | 0.00          | 0.920   | -0.04        | 0.142   | -0.04          | 0.201   | -0.03           | 0.405   | 0.02        | 0.494   | 0.04        | 0.304   | 0.15         | 0.041   |
| PC aa C36:6    | 0.00          | 0.841   | -0.01        | 0.764   | -0.03          | 0.295   | -0.02           | 0.519   | 0.06        | 0.066   | 0.00        | 0.902   | 0.16         | 0.030   |
| PC aa C34:4    | -0.02         | 0.385   | -0.02        | 0.522   | -0.04          | 0.185   | -0.02           | 0.515   | 0.06        | 0.095   | 0.05        | 0.182   | 0.13         | 0.082   |
| PC ae C34:0    | 0.01          | 0.691   | -0.03        | 0.244   | -0.04          | 0.240   | -0.03           | 0.448   | 0.05        | 0.171   | 0.08        | 0.041   | 0.09         | 0.203   |
| PC ae C32:1    | -0.01         | 0.570   | -0.03        | 0.306   | 0.00           | 0.883   | -0.02           | 0.533   | 0.01        | 0.824   | 0.06        | 0.151   | 0.11         | 0.137   |
| PC ae C32:2    | -0.02         | 0.403   | -0.04        | 0.105   | 0.01           | 0.854   | -0.03           | 0.357   | 0.05        | 0.185   | 0.05        | 0.213   | 0.15         | 0.031   |
| C14:1          | 0.01          | 0.671   | 0.00         | 0.935   | -0.01          | 0.858   | -0.09           | 0.014   | 0.01        | 0.688   | 0.00        | 0.963   | 0.07         | 0.302   |
| C3             | NA            | NA      | NA           | NA      | NA             | NA      | -0.05           | 0.129   | 0.00        | 0.945   | 0.01        | 0.732   | NA           | NA      |
| SM C18:1       | 0.00          | 0.921   | -0.04        | 0.185   | 0.02           | 0.413   | -0.05           | 0.126   | 0.07        | 0.060   | 0.04        | 0.353   | 0.07         | 0.341   |
| PC ae C34:1    | 0.00          | 0.983   | -0.02        | 0.407   | -0.02          | 0.461   | -0.03           | 0.344   | 0.03        | 0.347   | 0.09        | 0.025   | 0.08         | 0.269   |
| C16:2          | NA            | NA      | NA           | NA      | NA             | NA      | NA              | NA      | -0.01       | 0.836   | NA          | NA      | NA           | NA      |
| PC ae C42:0    | 0.00          | 0.908   | NA           | 1.000   | NA             | NA      | -0.02           | 0.632   | 0.04        | 0.287   | -0.04       | 0.302   | 0.10         | 0.152   |
| PC aa C40:3    | -0.02         | 0.380   | 0.00         | 0.935   | 0.01           | 0.679   | -0.01           | 0.840   | 0.00        | 0.969   | 0.00        | 0.933   | 0.13         | 0.082   |
| PC aa C42:4    | -0.03         | 0.166   | -0.01        | 0.631   | 0.03           | 0.293   | 0.00            | 0.962   | 0.04        | 0.306   | 0.03        | 0.420   | 0.14         | 0.051   |
| SM C16:0       | -0.03         | 0.122   | -0.03        | 0.331   | 0.02           | 0.572   | -0.01           | 0.730   | 0.02        | 0.479   | 0.09        | 0.017   | 0.08         | 0.257   |
| C14:2          | 0.00          | 0.924   | 0.03         | 0.210   | NA             | NA      | -0.07           | 0.036   | 0.03        | 0.474   | -0.02       | 0.662   | NA           | NA      |

| metabolite     | KORA (N=3003) |         | NTR (N=1314) |         | EGCUT (N=1084) |         | TwinsUK (N=810) |         | ERF (N=806) |         | LLS (N=643) |         | QIMR (N=193) |         |
|----------------|---------------|---------|--------------|---------|----------------|---------|-----------------|---------|-------------|---------|-------------|---------|--------------|---------|
|                | r             | p-value | r            | p-value | r              | p-value | r               | p-value | r           | p-value | r           | p-value | r            | p-value |
| SM C24:0       | -0.03         | 0.133   | -0.01        | 0.616   | 0.01           | 0.623   | 0.00            | 0.986   | 0.04        | 0.245   | 0.05        | 0.181   | 0.03         | 0.637   |
| PC aa C36:4    | -0.01         | 0.705   | -0.04        | 0.119   | -0.02          | 0.426   | -0.02           | 0.615   | 0.02        | 0.498   | 0.10        | 0.013   | 0.13         | 0.062   |
| PC ae C36:5    | -0.01         | 0.508   | -0.03        | 0.213   | -0.03          | 0.341   | 0.00            | 0.921   | 0.04        | 0.246   | 0.10        | 0.014   | 0.15         | 0.033   |
| SM C18:0       | 0.00          | 0.823   | -0.04        | 0.163   | 0.01           | 0.695   | -0.03           | 0.381   | 0.06        | 0.105   | 0.04        | 0.365   | 0.07         | 0.329   |
| C10:1          | 0.00          | 0.923   | 0.03         | 0.363   | NA             | NA      | -0.07           | 0.049   | 0.02        | 0.538   | 0.03        | 0.482   | NA           | NA      |
| lysoPC a C20:3 | 0.00          | 0.923   | 0.02         | 0.388   | -0.01          | 0.627   | -0.04           | 0.285   | -0.04       | 0.254   | 0.06        | 0.129   | 0.10         | 0.166   |
| PC ae C36:0    | 0.01          | 0.696   | -0.01        | 0.600   | -0.04          | 0.159   | -0.01           | 0.722   | 0.01        | 0.872   | 0.03        | 0.430   | 0.14         | 0.046   |
| PC aa C38:6    | 0.01          | 0.716   | -0.03        | 0.338   | -0.02          | 0.474   | -0.02           | 0.584   | 0.04        | 0.280   | 0.00        | 0.906   | 0.13         | 0.071   |
| PC aa C42:6    | -0.01         | 0.695   | -0.02        | 0.467   | NA             | NA      | -0.02           | 0.529   | 0.08        | 0.023   | -0.03       | 0.458   | 0.11         | 0.139   |

Supplementary Table 4: Top findings of partial correlation meta-analysis results of LTL and metabolites, including and excluding the TwinsUK cohort, adjusted for age and sex

| Metabolite     | Analysis including TwinsUK |                  |       |                      | Analysis excluding TwinsUK |                 |       |                      | Metabolite full name                 |
|----------------|----------------------------|------------------|-------|----------------------|----------------------------|-----------------|-------|----------------------|--------------------------------------|
|                | N                          | direction*       | r     | p-value              | N                          | direction       | r     | p-value              |                                      |
| lysoPC a C17:0 | 7853                       | ++- <b>+++</b>   | 0.05  | 7.1x10 <sup>-6</sup> | 7043                       | +++ <b>+++</b>  | 0.06  | 2.8x10 <sup>-6</sup> | Lysophosphatidylcholine acyl C17:0   |
| Met            | 7852                       | --- <b>---+</b>  | -0.04 | 9.2x10 <sup>-5</sup> | 7042                       | -----+          | -0.05 | 4.5x10 <sup>-5</sup> | Methionine                           |
| Tyr            | 7047                       | --- <b>?-+</b>   | -0.04 | 2.1x10 <sup>-4</sup> | 6237                       | --- <b>?-+</b>  | -0.04 | 5.4x10 <sup>-4</sup> | Tyrosine                             |
| PC aa C32:1    | 7851                       | --- <b>---+</b>  | -0.04 | 2.4x10 <sup>-4</sup> | 7041                       | --- <b>---+</b> | -0.04 | 1.1x10 <sup>-3</sup> | Phosphatidylcholine diacyl C32:1     |
| C3-OH          | 1449                       | ???? <b>--?</b>  | -0.10 | 2.6x10 <sup>-4</sup> | 1449                       | ???? <b>--?</b> | -0.10 | 2.6x10 <sup>-4</sup> | Hydroxypropionylcarnitine            |
| PC ae C38:4    | 7853                       | +- <b>---+++</b> | 0.04  | 9.0x10 <sup>-4</sup> | 7043                       | +- <b>+++</b>   | 0.04  | 3.0x10 <sup>-4</sup> | Phosphatidylcholine acyl-alkyl C38:4 |

\* Order of cohorts in direction column: KORA, NTR, EGCUT, TwinsUK (in red and bold), ERF, LLS, QIMR; Direction of effect represented by - (negative correlation) + (positive correlation) or ? (not included) for each study



Supplementary Table 5: Top findings of partial correlation meta-analysis results of LTL and metabolites, including and excluding the QIMR cohort, adjusted for age and sex

| Metabolite     | Analysis including QIMR |                 |       |                      | Analysis excluding QIMR |            |       |                      | Metabolite full name                 |
|----------------|-------------------------|-----------------|-------|----------------------|-------------------------|------------|-------|----------------------|--------------------------------------|
|                | n                       | direction*      | r     | p-value              | n                       | direction* | r     | p-value              |                                      |
| lysoPC a C17:0 | 7853                    | ++-+++ <b>+</b> | 0.05  | 7.1x10 <sup>-6</sup> | 7660                    | ++-+++     | 0.05  | 1.3x10 <sup>-5</sup> | Lysophosphatidylcholine acyl C17:0   |
| Met            | 7852                    | ----- <b>+</b>  | -0.04 | 9.2x10 <sup>-5</sup> | 7659                    | -----      | -0.05 | 5.0x10 <sup>-5</sup> | Methionine                           |
| Tyr            | 7047                    | ----? <b>+</b>  | -0.04 | 2.1x10 <sup>-4</sup> | 6854                    | ----?-     | -0.05 | 1.1x10 <sup>-4</sup> | Tyrosine                             |
| PC aa C32:1    | 7851                    | ----+ <b>+</b>  | -0.04 | 2.4x10 <sup>-4</sup> | 7658                    | ----+-     | -0.04 | 1.3x10 <sup>-4</sup> | Phosphatidylcholine diacyl C32:1     |
| C3-OH          | 1449                    | ????- <b>?</b>  | -0.10 | 2.6x10 <sup>-4</sup> | 1449                    | ????--     | -0.10 | 2.6x10 <sup>-4</sup> | Hydroxypropionylcarnitine            |
| PC ae C38:4    | 7853                    | +--+++ <b>+</b> | 0.04  | 9.0x10 <sup>-4</sup> | 7660                    | +--+++     | 0.04  | 1.8x10 <sup>-3</sup> | Phosphatidylcholine acyl-alkyl C38:4 |

\* Order of cohorts in direction column: KORA, NTR, EGCUT, TwinsUK, ERF, LLS, QIMR (in red and bold); Direction of effect represented by - (negative correlation) + (positive correlation) or ? (not included) for each study
